# The novel shapeshifting bacterial phylum *Saltatorellota*

Sandra Wiegand<sup>1†\*</sup> and Mareike Jogler<sup>1,2†</sup>, Timo Kohn<sup>1</sup>, Ram Prasad Awal<sup>3</sup>,  
Sonja Oberbeckmann<sup>4</sup>, Katharina Keszy<sup>4</sup>, Olga Jeske<sup>2</sup>, Peter Schumann<sup>2</sup>, Stijn H.  
Peeters<sup>1</sup>, Nicolai Kallscheuer<sup>1</sup>, Mike Strauss<sup>5</sup>, Anja Heuer<sup>2</sup>, Mike S. M. Jetten<sup>1</sup>,  
Matthias Labrenz<sup>4</sup>, Manfred Rohde<sup>6</sup>, Christian Boedeker<sup>2</sup>, Harald Engelhardt<sup>5</sup>,  
Dirk Schüler<sup>3</sup> and Christian Jogler<sup>1,7\*</sup>

<sup>1</sup> Radboud University, Nijmegen, The Netherlands

<sup>2</sup> Leibniz Institute DSMZ, Braunschweig, Germany

<sup>3</sup> University Bayreuth, Germany

<sup>4</sup> Leibniz Institute for Baltic Sea Research Warnemünde (IOW), Germany

<sup>5</sup> Max Planck Institute of Biochemistry, Martinsried, Germany

<sup>6</sup> Helmholtz Centre for Infection Research, Braunschweig, Germany

<sup>7</sup> Friedrich Schiller Universität Jena, Germany

\*Correspondence to [s.wiegand@science.ru.nl](mailto:s.wiegand@science.ru.nl) (Phylogeny) or [christian@jogler.de](mailto:christian@jogler.de)  
(Environmental Microbiology, Cultivation and Cell Biology)

†Authors contributed equally

## Abstract

Our current understanding of a free-living bacterium - capable of withstanding a variety of environmental stresses- is represented by the image of a peptidoglycan-armored rigid casket. The making and breaking of peptidoglycan greatly determines cell shape. The cytoplasmic membrane follows this shape, pressed towards the cell wall by turgor pressure. Consequently, bacteria are morphologically static organisms, in contrast to eukaryotic cells that can facilitate shape changes. Here we report the discovery of the novel bacterial phylum *Saltatorellota*, that challenges this concept of a bacterial cell. Members of this phylum can change their shape, are capable of amoeba-like locomotion and trunk-formation through the creation of extensive pseudopodia-like structures. Two independent *Saltatorellota* cells can fuse, and they employ various forms of cell division from budding to canonical binary fission. Despite their polymorphisms, members of the *Saltatorellota* do possess a peptidoglycan cell wall. Their genomes encode flagella and type IV pili as well as a bacterial actin homolog, the ‘saltatorellin’. This protein is most similar to MamK, a dynamic filament-forming protein, that aligns and segregates magnetosome organelles via treadmilling. We found saltatorellin to form filaments in both, *E. coli* and *Magnetospirillum gryphiswaldense*, leading to the hypothesis that shapeshifting and pseudopodia formation might be driven by treadmilling of saltatorellin.

**Key words:** PVC superphylum, Planctomycetes, cell biology, evolution, cell shape and motility, cell differentiation

## Introduction

The bacterial *Planctomycetes-Verrucomicrobia-Chlamydiae* (PVC) superphylum comprises extraordinary bacterial phyla of medical, environmental and biotechnological importance [1, 2]. Among those, the phylum *Chlamydiae* is most intensely studied. It consists primarily of pathogens with small, reduced genomes that divide without the canonical bacterial cell division protein FtsZ [3]. The presence or absence of peptidoglycan (PG) was debated for decades - a controversy known as the chlamydial anomaly [4-9]. Today, the presence of PG, which is required for cell division, is accepted [7, 9-12]. Not all *Chlamydiae* are pathogens, some might even be symbionts known as environmental *Chlamydiae* [13]. However, this term is misleading as all described members of the phylum *Chlamydiae* are obligate intracellular bacteria [13].

The phylum *Verrucomicrobia* comprises free-living species with unparalleled cell shapes exemplified by *Verrucomicrobium spinosum* [14]. *Akkermansia muciniphila* [15] and other species that reside in the human intestinal tract can act as probiotics [16], influence obesity [17-19] or cancer treatment [20]. Other members of the phylum display unique metabolic traits such as thermoacidophilic methanotrophy [21, 22] or performance of the Knallgas reaction [23]. Similar to *Chlamydiae*, the presence of peptidoglycan in all phylogenetic branches of the phylum was only recently determined [24]. However, and in contrast to *Chlamydiae*, species of the phylum *Verrucomicrobia* encode FtsZ [25].

Members of the phylum *Planctomycetes* are ubiquitous bacteria that play major roles in global carbon and nitrogen cycles [2]. They perform the unique anammox reaction [26] by converting ammonium to dinitrogen gas [27]. Many *Planctomycetes* dwell on all sorts of marine surfaces [28-33] where they can dominate biofilms [34] and digest complex carbon substrates [35, 36]. Like *Chlamydiae* [10] and *Verrucomicrobia* [24], *Planctomycetes* were only recently found to possess peptidoglycan [37, 38]. With exception of *Candidatus Brocadia* [39, 40], the anammox *Planctomycetes*, planctomycetal internal structures were rather found to be invaginations of the cytoplasmic membrane [41-43] than intracytoplasmic compartments as stated before [41, 44, 45]. *Planctomycetes* divide without FtsZ [3, 46, 47], either by polar, lateral or arbitrary budding [47, 48], or by binary fission.

In a recent study, we brought many novel planctomycetal strains into axenic culture and compared their characteristics [47]. The isolates of a phylogenetically deep branching group have rather small genomes compared to their peers and they are particularly rich in extracytoplasmic function  $\sigma$  factors (ECFs) [47]. They are most unique, as the cells divide by polar budding and binary fission [47]. Such exceptions from canonical *Planctomycetes*

motivated us to investigate these strains further. Here we show how members of this group can shift their shape, divide in multiple different ways and are capable of amoeba-like locomotion. We reveal indications for cell fusions and the formation of trunk-like protuberances. We exclude osmotic artefacts by determining the strains natural habitat and analyse their genomes towards their unusual traits. Finally, we validly describe the three novel species *Saltatorellus ferox*, *Engelhardtia mirabilis* and *Rohdeia mirabilis* and propose that they do not belong to the phylum *Planctomycetes* but are affiliated to the novel phylum *Saltatorellota* within the PVC superphylum.

## Results and Discussion

During the last years, we isolated and characterized 78 novel planctomycetal strains [47]. Among them were three deep branching strains that appeared quite unusual in terms of cell division: cells of *Saltatorellus ferox* Poly30<sup>T</sup> were shown to proliferate by binary fission or by budding [47]. To study this extraordinary behavior in greater detail, we employed time-lapse light microscopy and observed that *Engelhardtia mirabilis* Pla133<sup>T</sup> cells also seem to be dividing by budding and binary fission (Fig. 1a and Movie S1). In addition, some cells divide only after massive swelling and it appears that in these cells, the cytoplasmic membrane divides first, only later followed by the outer membrane (Fig. 1a and Movie S1).

Even more unusual, *E. mirabilis* Pla133<sup>T</sup> cells appear to be fusing (Fig. 1b and Movie S2). To our knowledge such a cell fusion was never before observed among bacteria. However, it is almost impossible to determine if the fusing cells were entirely separated before, or if some kind of membrane-enclosed channel, maybe a remainder of an incomplete earlier division, facilitated the cell fusion. This is partly because acknowledged techniques to visualize such structures - as for example FM4-64 membrane staining - were not operational for *Saltatorellota* cells in our hands.

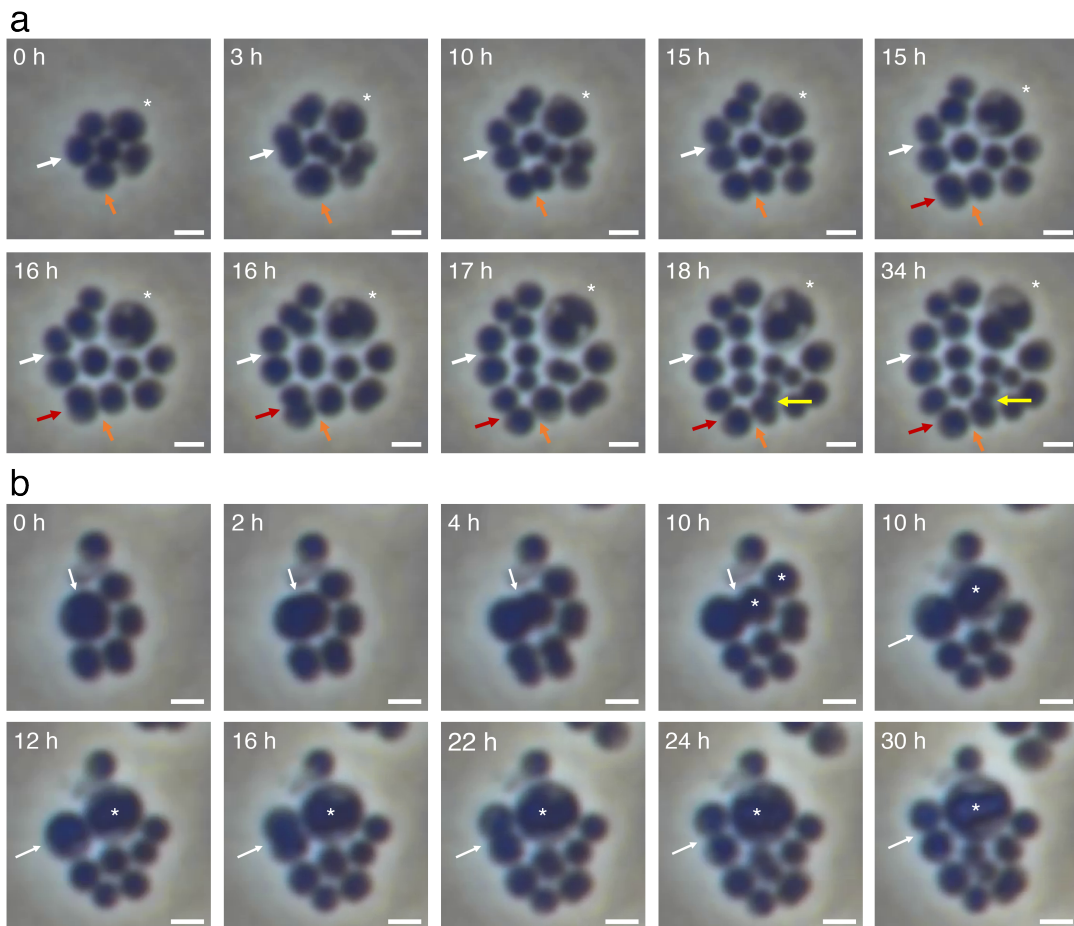

**Fig. 1. *Engelhardtia mirabilis* Pla133<sup>T</sup> – division and fusion observed with time-lapse microscopy. a)** Cells of *E. mirabilis* Pla133<sup>T</sup> divide by multiple different mechanisms. Cells divide by binary fission (white, red and orange arrows) or polar budding (yellow arrow). Some cells (asterisk) swell and seem to divide first on the inside by a sort of budding where the outermost membrane follows the division process only later (34 h). **b)** Cells of *E. mirabilis* Pla133<sup>T</sup> can fuse. A cell starts to divide by a sort of asymmetric binary fission (0-4 h, white arrow), when the daughter cell suddenly fuses with an adjacent cell (10 h, asterisk). The resulting cell (12-30 h, asterisk) appears to reshape the cytoplasm until it seems to divide again like the giant cell in a) (18-34h, asterisk). In contrast, the mother cell divides again by then symmetric binary fission (10-30 h, white arrow). Scale bar 1  $\mu$ m.

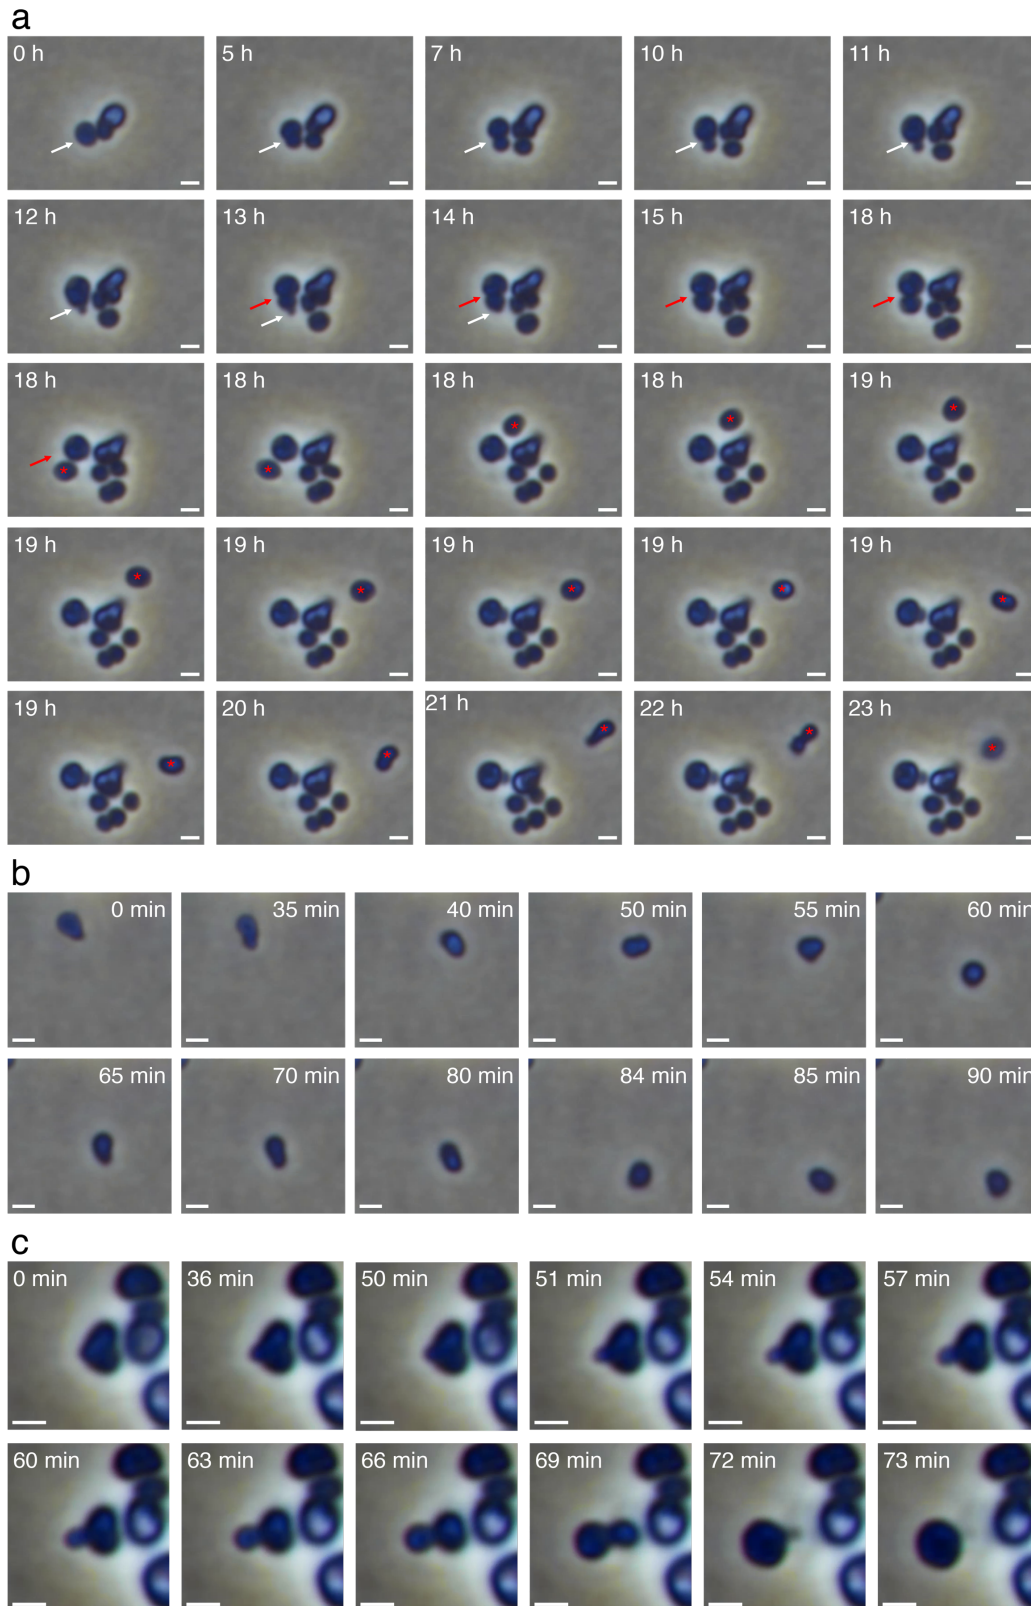

**Fig. 2. Locomotion and shapeshifting of *Saltatorellus ferox* Poly30<sup>T</sup> observed with time-lapse microscopy. a)** A cell seems to divide by budding (0-10 h, white arrow), but the budding process appears to be reversed (11-12 h, white arrow) while a second division by asymmetric binary fission occurs afterwards (13-18 h, red arrow). Once the daughter cell is separated (18 h, red asterisk), it starts to move (19-23 h) while locomotion is related with shapeshifting. **b)** At higher temporal and spatial resolution, a single cell moves despite the agar cushion by changing its shape. It reminds of amoeboid movement. **c)** A heart-shaped cell of strain Poly30<sup>T</sup> (0 min) seems to start dividing by budding (0-60 min). The putative mother cell shrinks (63-69 min) and fuses again with the putative daughter cell (72-73 min). This way, via partial budding and subsequent refusion the cell moved on the agar cushion. Scale bars 1  $\mu\text{m}$ .

However, such unusual and unique interactions were not limited to *E. mirabilis* Pla133<sup>T</sup>, and once we started to re-analyze *S. ferox* Poly30<sup>T</sup>, we got even more intriguing results. In Fig. 2a and Movie S3 we were able to capture an incomplete and reversed budding process, followed by cell division by binary fission. Later, the daughter cell was found moving while changing shape. This shapeshifting seems to be key to the locomotion process and is reminiscent of the amoeboid locomotion of protists. Cells in Fig. 1 and 2a were immobilized by an agar cushion, a process well established for analyzing planctomycetal cells in our laboratory preventing flagella-mediated movements. If single moving cells were analyzed at higher magnification and temporal resolution, it became evident that the shape of *S. ferox* Poly30<sup>T</sup> is changing in order to cause the amoeba-like locomotion. Parts of the cell seem to reach out for a new direction (Fig. 2b and Movie S4, 0-35 min), similar to pseudopodia of amoeba. Then, the entire cell appears to be pulled to the new location quite fast (Fig. 2b and Movie S4, 35-40 min). This behavior seems to be occurring in a small fraction of newly formed daughter cells, maybe implying some kind of cell differentiation (Movie S5).

Potential artefacts such as depressions in the agar cushions that allow cells to float by Brown motion could be excluded not only by careful specimen preparation, but by observation: if cells cross the focal plane, their shape appears blurry and ring like artefacts appear around them (moving cells in Movie S5). However, cells shapeshift and move in the focal plane as well (Movie S5).

A similar process intertwined with intense shapeshifting, although without ongoing progressive motion, becomes most obvious in Fig. 2c and Movie S6. The heart-shaped cell on the left-hand side seems to start a budding division cycle, but then just tunnels to its new position, where it adopts a spherical shape. Afterwards, the cell starts a successful reproductive cycle and releases three consecutive daughter cells by budding. Most of the described motility traits were

observed if individual cells, or cells that were part of small aggregates were analyzed. However, if larger aggregates were explored, an additional type of protuberance formation became visible: the formation of a trunk-like structure, a structure formed and retracted like an amoeboid pseudopodium grasping for food particles (Fig. 3 and Movie S7). Formation and retraction of the structure took about 50 minutes. In our experimental setting, other than shapeshifting, trunk-formation did not result in any locomotion. However, both phenomena do parallel the formation of pseudopodia by amoeba that either sense the environment to initiate an endocytic or pinocytotic event or lead to locomotion.

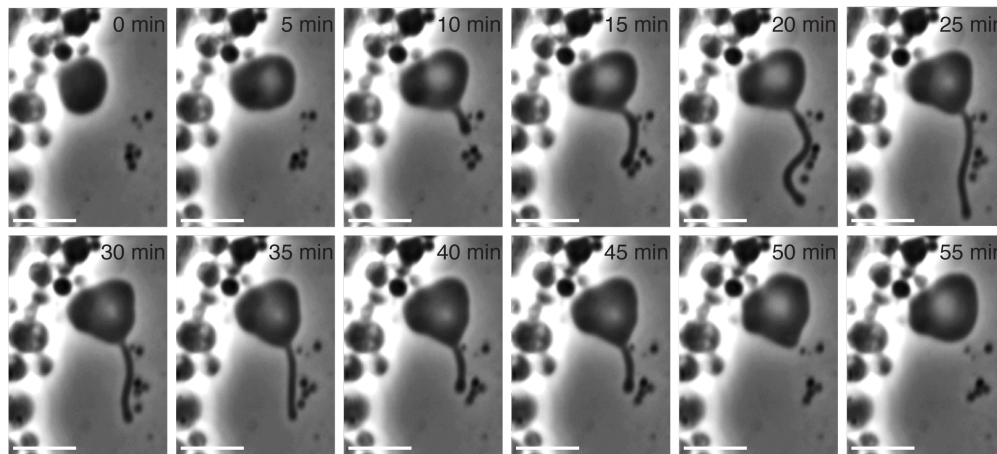

**Fig. 3. Trunk formation of a giant *Saltatorellus ferox* Poly30<sup>T</sup> cell observed with time-lapse microscopy.** In particular at the edge of huge aggregates, formed by hundreds of cells, single giant Poly30<sup>T</sup> cells appear (Fig. S1) that can form trunk-like protuberances. Such structures remind of eukaryotic amoeboid pseudopodia for food absorption. Scale bar 5  $\mu\text{m}$ .



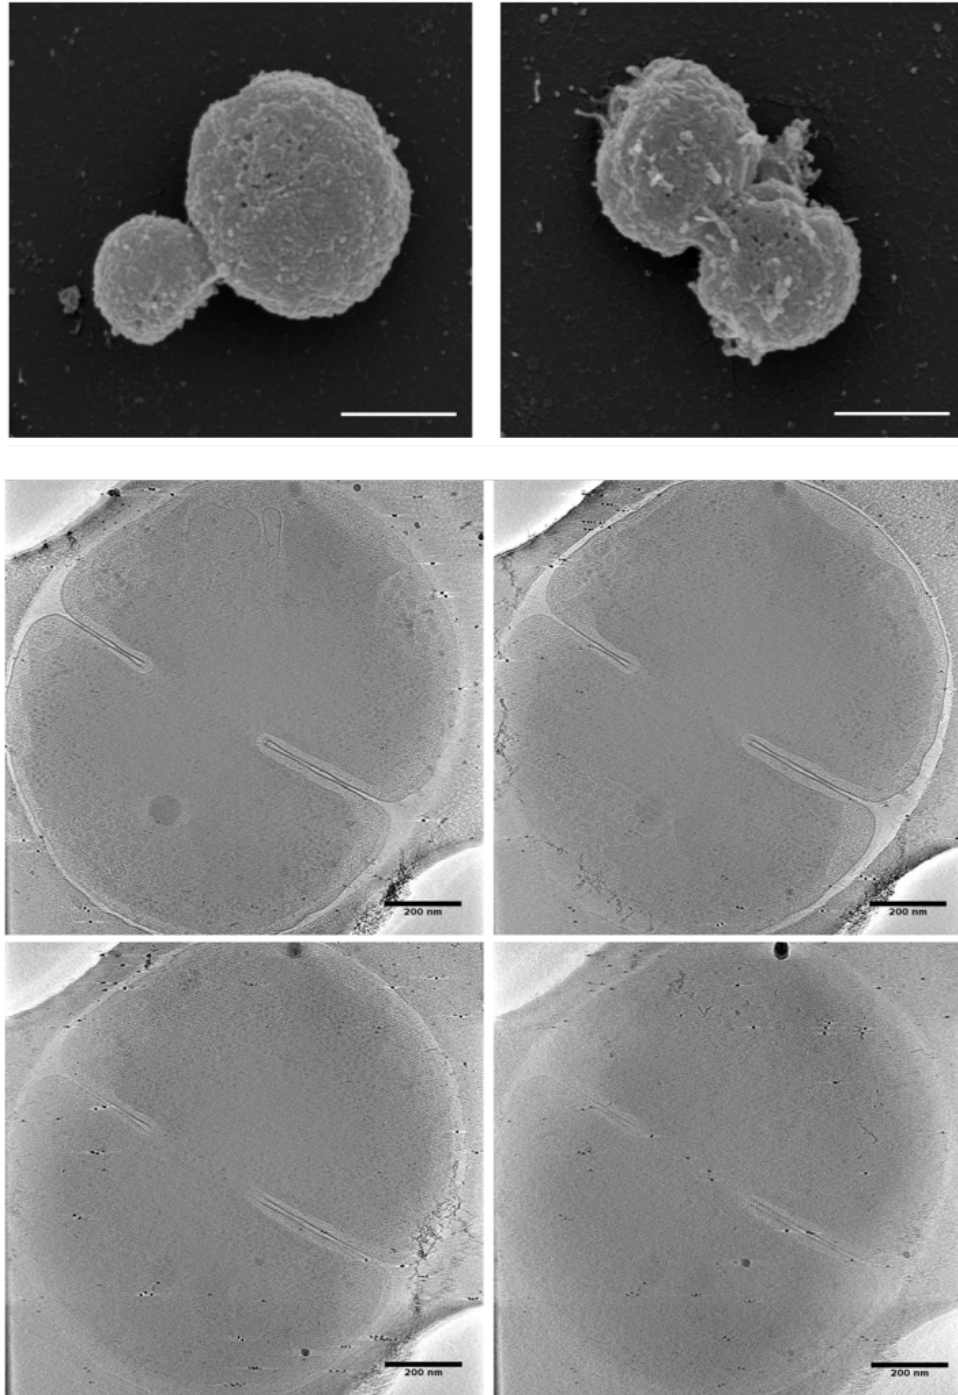

**Fig. 4. *Saltatorellota* divide by binary fission and budding. a)** *Saltatorellus ferox* Poly30<sup>T</sup> divides either by budding or by binary fission. The left and the right SEM micrograph show cells of the same species that divides by budding and binary fission, respectively. Scale bar 500 nm. **b)** Cryo-electron tomography of an *Engelhardtia mirabilis* Pla133<sup>T</sup> cell. Four slices of the tomogram are shown that illustrate typical septum formation during binary fission of a coccoid cell. The cell is very flat and has multiple invaginations of the cytoplasmic membrane. Scale bar 200 nm.

To complement these light microscopic observations, we also employed different electron microscopic methods. Using scanning electron tomography (SEM), we were able to reproduce the different ways of cell division, showing that cells from the same axenic culture can divide either by budding, or by binary fission (Fig. 4a). Additionally, we employed cryo-electron tomography (CET) and analyzed frozen-hydrated cells of *E. mirabilis* Pla133<sup>T</sup>. The cell depicted in Fig. 4b divides by binary fission, just like a canonical coccoid Gram-negative bacterium. Going through the four different planes, multiple interconnected cytoplasmic invaginations become visible. Although such enlargements of the periplasmic space and tubular-vascular networks were previously described for *Planctomycetes* [41, 42], *E. mirabilis* Pla133<sup>T</sup> appears quite unusually, more detailed and with a higher degree of curved membranes, compared with cells of the phylum *Planctomycetes*.

A bigger picture of the various, above described traits emerges when approaching not only individual cells, but when focusing on the large aggregates they usually form when axenically cultured (Fig. S1). In growing aggregates (Movies S8 and S9) especially such traits as shapeshifting, motility and trunk formation can be observed. In Movie S10, a distinct trunk and a single motile cell appear in close proximity. Together with Movie S5 where at least one daughter cell from each microcolony moves away from the mother cell, one might speculate on a scouting function of this kind of differentiated cells. Precise quantification of the different phenotypes was hampered by this aggregate formation as even smaller aggregates span so many focal planes that only one layer can be observed at a time.

Dissolved solutes within bacteria cause significant osmotic pressure that is counteracted by peptidoglycan (PG), a rigid polymeric mesh of linear glycans [49] cross-linked by short peptides [50]. Among all free-living bacteria, PG is essential for the maintenance of cell integrity [24, 38]. Therefore, the unusual cell biology of *Saltatorellota* should be prevented by the rather static peptidoglycan (PG) sacculus [51]. The synthesis of PG, together with FtsZ and 11 other canonical proteins, is essential for septal formation during cell division [52]. Thus, most bacteria comprise both, a PG cell wall and FtsZ. However, all three *Saltatorellota* strains were found to lack FtsZ along with most other canonical cell division proteins. Thus, while PG has been found in all PVC phyla, we wondered if members of the *Saltatorellota* might be different in this regard. This question was further urged by the observation that *Saltatorellota* cells are rather fragile. Centrifugation (4000 g, 10 min) seems to inactivate a significant

proportion of cells and even careful blotting of electron microscopic grids on a paper tissue appeared to destroy the outer membrane of some cells. Furthermore, their general behavior reminds of cell wall-deficient L-form bacteria [53-55], or members of the PG-lacking phylum *Tenericutes*, e.g. *Mycoplasma* [56], that show comparable changes in shape, but are osmotically fragile and live host-associated [56].

To address the question of PG presence, we employed a methodology that was used before to detect PG in *Planctomycetes* [38] and *Verrucomicrobia* [24]. Firstly, we analyzed *Saltatorellota* cells for the presence of diaminopimelic acid (DAP). This non-proteinogenic amino acid is the diagnostic trifunctional linker in most Gram-negative PG sacculi and can be detected by characteristic mass over charge peaks in GC-MS spectra. *E. mirabilis* Pla133<sup>T</sup> showed clear DAP-specific signals (380, 324, 306 and 278 m/z), while *S. ferox* Poly30<sup>T</sup> showed only weak signals at 380, 324 and 278 m/z (Fig. S2). Nevertheless, the presence of PG is at least very likely in *E. mirabilis* Pla133<sup>T</sup> and *S. ferox* Poly30<sup>T</sup>. However, a continuous sacculus cannot be concluded from DAP analysis. In Fig. 4b - where the PG layer of *E. mirabilis* Pla133<sup>T</sup> is generally visible - it appears slightly discontinuous. This phenomenon is well known, caused by the method-inherent missing wedge as previously observed in e.g. *Planctomycetes* [38]. For *Rohdeia mirabilis* Pla163<sup>T</sup>, none of the DAP-specific signals could be detected at 380m/z and 306 m/z. Therefore, we prepared PG sacculi from this strain and TEM analysis clearly showed continuous PG sacculi as typical for Gram-negative bacteria (Fig. S3). *R. mirabilis* Pla163<sup>T</sup> forms an extensive extracellular matrix, creating almost tissue-like aggregates. Given that DAP detection is based on wet cell mass the extensive matrix might have pushed cell numbers below DAP detection limit.

Taken together, all isolated *Saltatorellota* strains apparently possess a continuous PG sacculus that might undergo intensive modulations during shapeshifting, amoeba-like locomotion or trunk-formation.

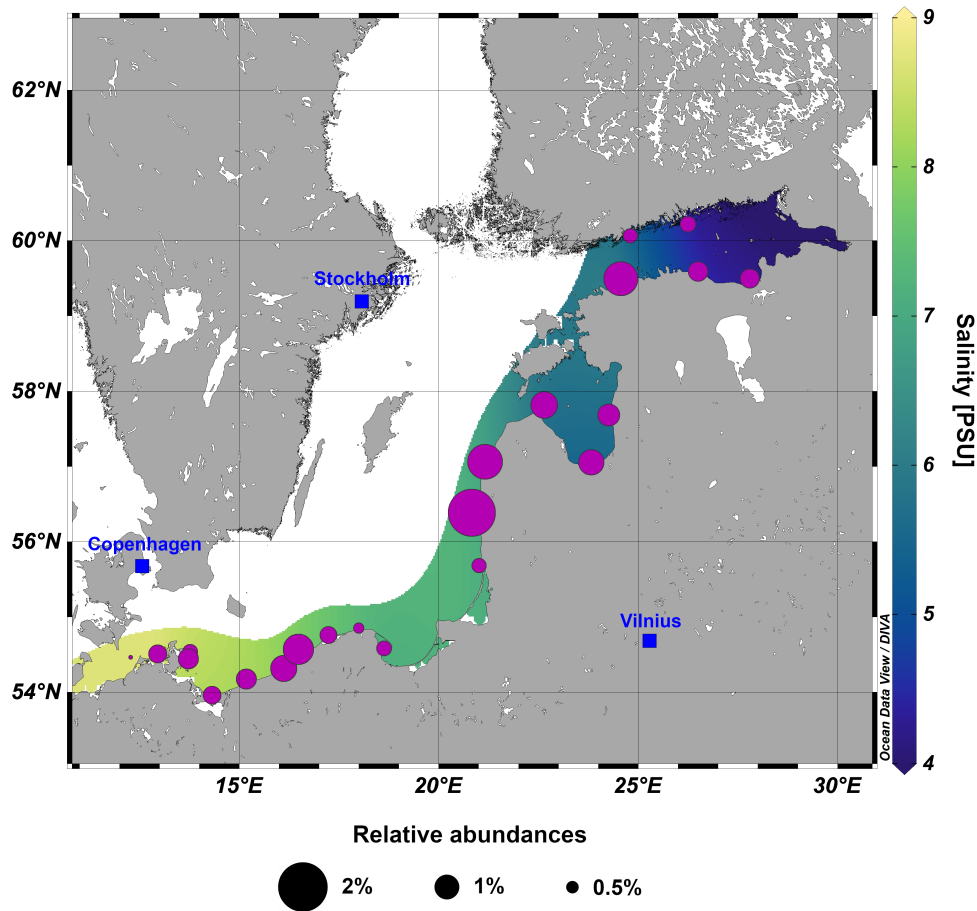

**Fig. 5. Natural occurrence of *Saltatorellota* strains in northern European Baltic Sea.** The mean relative abundances (indicated by dot sizes) of 16S rRNA gene sequences from the particle-attached fraction determined by >97% identity to *Saltatorellota* strains Pla133<sup>T</sup>, Pla163<sup>T</sup> and Poly30<sup>T</sup>. The background color scheme gives the salinity range along the southern and eastern coastline.

All novel *Saltatorellota* isolates were obtained from microplastic particles incubated for two weeks either in the Baltic Sea or an inflowing river estuary with salinities of 1-1.5% as described before [47, 57]. In order to exclude osmotic stress and to gain deeper insights into the natural habitat of these strains, water samples were taken along the southern and eastern coastline of the Baltic Sea. We measured a salinity gradient of 4-9 PSU (approximately 0.4-0.9%) along the transect (Fig. 5). *Saltatorellota* strains accounted for nearly 2% of the bacterial community in particle-attached fractions of the samples but were sparse in free-living fractions (Fig. 5, Table S1). Thus, *Saltatorellota* should be able to cope at least with salinity shifts

between 0.4 and 1.5% under environmental conditions. To determine the optimal salinity for our *Saltatorellota* isolates, we tested media compositions with differing artificial seawater concentrations and observed optimal growth at concentrations corresponding to salinities of approximately 1-3%. Thus, we performed all our time-lapse experiments at two different salinities, both providing optimal growth conditions (2.03% and 1.35%), without noting a difference in cell behavior.

Consequently, our observations such as shapeshifting cannot be explained by osmotic artefacts. Furthermore, we conclude that the *Saltatorellota* strains are not osmotically fragile, despite their need to constantly re-modulate their peptidoglycan layer.

Since neither absence of PG, nor osmotic fragility could explain the unusual behavior of the *Saltatorellota* strains, we were wondering if they might encode proteins responsible for bacterial motility such as swimming, gliding, twitching or sliding [58] (Table S2). All three *Saltatorellota* isolates harbor the gene set required for building a canonical bacterial flagellum, localized in two mostly conserved clusters at distinct loci (Fig. S4, Table S2 and S3). From a genomic perspective, all three strains should therefore be capable to form a bacterial flagellum. Unexpectedly, *S. ferox* Poly30<sup>T</sup> and *E. mirabilis* Pla133<sup>T</sup> did not do so under the tested conditions. For >300 cells on 20 micrographs we did not observe a single flagellum. Neither did any of our light-microscopic observations or time-lapse series indicate any flagella-propelled swimming activity for both strains. However, in three TEM micrographs of *R. mirabilis* Pla163<sup>T</sup>, a flagellum was visible, but never attached to the cell body. Therefore, the observed locomotion is most likely unrelated to flagellar formation.

Besides flagella, we identified a second type of bacterial motility genes in the three *Saltatorellota* strains: genes encoding proteins for twitching motility (Fig. S5, Table S2 and S3). Key to this type of locomotion are long, thin appendages called type IV pili (T4P) [59]. These T4Ps are polymerized and depolymerized to fulfil their functions, that besides twitching motility are the uptake of DNA, biofilm or microcolony self-organization and many more [59]. T4P-mediated movement of the cell results from cycles of T4P elongation, surface adhesion and retraction [59]. T4Ps are thereby used as ‘grappling hooks’ leading to a characteristic jerky movement of cells [60]. However, what we observed for our *Saltatorellota* strains is very unlike this typical twitching movement. The closest relatives of *Saltatorellota*, the *Planctomycetes*, were also found to possess T4Ps, but twitching motility was never observed among this phylum [61]. Accordingly, they seem to lack the ATPase required for filament

retraction. In contrast, *Saltatorellota* strains do encode PilB and PilT (Fig. S5, Table S2 and S3), the ATPases required for T4P formation and retraction. Thus, the T4P system might be involved in *Saltatorellota* locomotion or trunk-formation, but in an unseen manifestation. Furthermore, it could as well be responsible for the almost tissue-like microcolony and biofilm.

Nonetheless, canonical twitching motility cannot explain the observed amoeba-like locomotion or shapeshifting capability of *Saltatorellota* cells. In amoeboid cells such traits require a complex interplay of cytoskeletal elements (actin) with motor proteins (myosin). We were able to exclude the presence of motor proteins in the *Saltatorellota* isolates by mining the *Saltatorellota* genomes for homologs of eukaryotic myosin, kinesin and dynamin. On the other hand, the *Saltatorellota* strains each harbor two actin homologs [47]. In a detailed cluster analysis (see Material and Methods), we determined the position of these homologs in relation to all putative actin homologs in the BLAST nr database. We found that all three *Saltatorellota* strains encode MreB, the canonical actin homolog in bacteria, and a novel actin homolog that we suggest naming ‘saltatorellin’ (Fig. 6a). Saltatorellin branches close to MamK, an actin-like filament found in magnetotactic bacteria [62] such as *Magnetospirillum gryphiswaldense* (Fig. S6, Table S4). MamK was found to provide the sole driving force for magnetosome movement by pole-to-midcell treadmilling growth of cytomotive actin-like filaments [63]. Thus, we fused the saltatorellin gene of *S. ferox* Poly30<sup>T</sup> to mCherry and found the product of this fusion construct to form filaments in *E. coli* and *M. gryphiswaldense* cells (Fig. 6b.). Our findings open the possibility that saltatorellin has properties comparable to MamK and might drive shapeshifting and amoeba-like locomotion in *Saltatorellota* by treadmilling. However, this hypothesis will need further experimental work, especially after genetic accessibility of the new phylum is achieved.

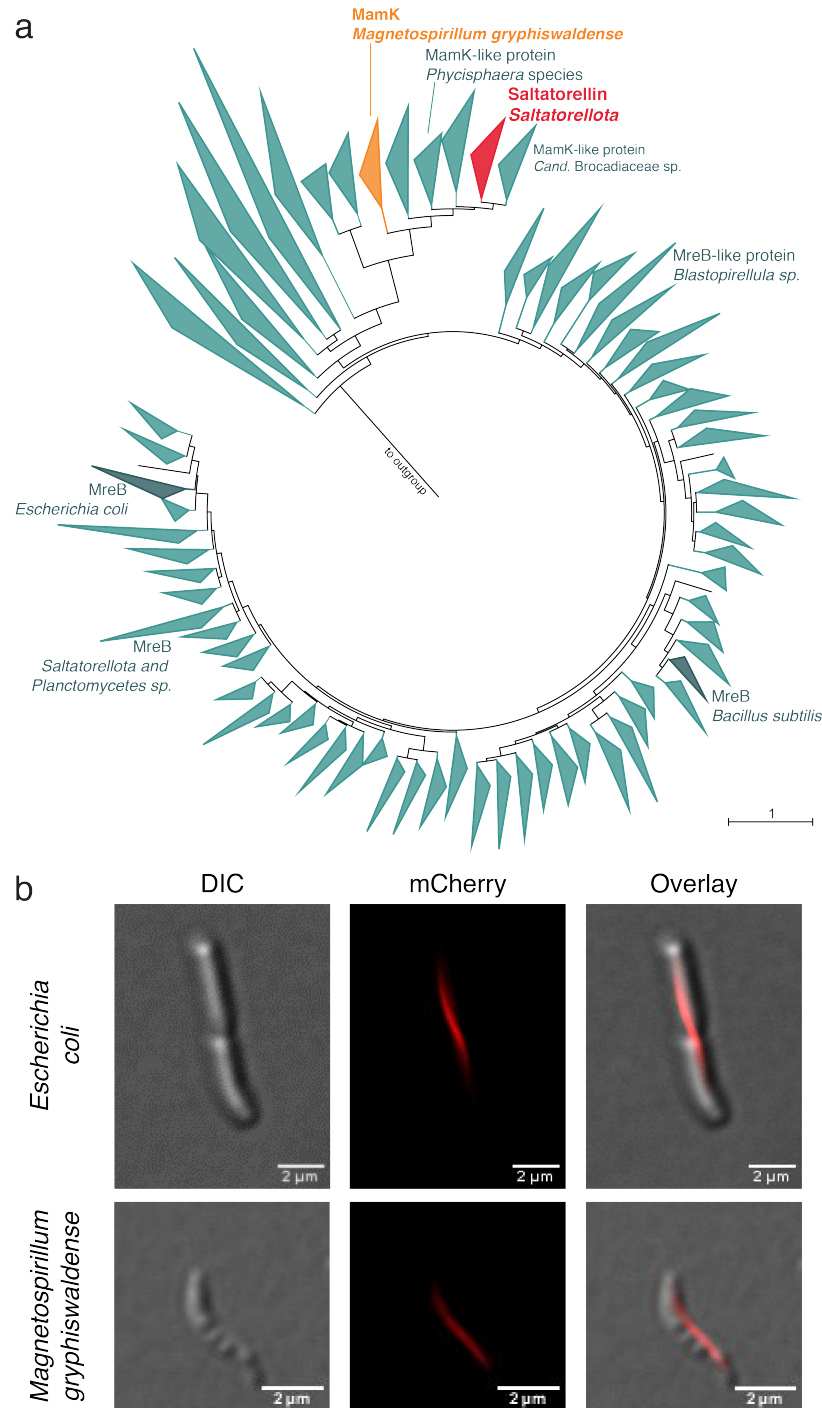

**Fig. 6. Actin homologs in *Saltatorellota*.** **a)** Analysis of 14299 bacterial actin homologs, with a depicted subset of actin homologs closely related to MreB. While MreB is encoded by different species throughout the bacteria domain as expected, a second actin homolog of *Saltatorellota* branches close to MamK usually found in magnetotactic bacteria. **b)** Localization of the *Saltatorellota* MamK-like protein. Fluorescence micrographs of *E. coli* WM3064 (upper panel) and *M. gryphiswaldense* (lower panel) expressing the MamK-like from *Saltorellus ferox* Poly30<sup>T</sup> using the plasmid pBBR1-P<sub>ter</sub>-mCherry::mamK-like<sub>Poly30</sub>. In both organisms, the labelled protein localized along a filamentous structure.

## Phylogeny

From our recent publication [47] that initially mentions the three novel isolates and their genomes it does not become clear at which position within the planctomycetal phylum these novel isolates cluster as their position shifts with the method applied. To reliably determine the phylogenetic affiliation of the isolates we strived to assess them more comprehensively. At first, we appended their 16S rRNA genes to the alignment of all sequences denominated as *Planctomycetes*, *Verrucomicrobia*, *Chlamydiae*, *Lentisphaerae*, *Kiritimatiellaeota* and *Omnitrophicaeota* provided in the SILVA database release SSU Ref NR 99 [64]. Upon maximum likelihood tree formation, it became apparent that strains Poly30<sup>T</sup>, Pla133<sup>T</sup> and Pla163<sup>T</sup> cluster within the uncultured SILVA taxonomy group OM190 [32, 34] (Fig. S7), classified as subclade of the *Planctomycetes*. Although the clade appears to be monophyletic, we were not able to conclusively determine its placement within the phylum *Planctomycetes*. We found the group to either cluster together with *Candidatus* Brocadiaceae or to branch deeper or less deep. An even more random branching of the members of clade OM190 was observed when the same approach was repeated with 23S rRNA genes. A more robust phylogeny for the PVC superphylum was gained using the alternative phylogenetic marker protein RpoB (Fig. S8 and S9). With this approach, a recurring clustering of the superphylum could be achieved. A monophyletic clade comprising strains Poly30<sup>T</sup>, Pla133<sup>T</sup> and Pla163<sup>T</sup> and several metagenome-assembled genomes (MAGs) can be found in this tree. For a genome-based evaluation of the PVC superphylum, we relied on a phylogenetic assessment calculated from 120 ubiquitous single-copy proteins with the method used to build the GTDB taxonomy [65]. This again established a robust phylogenetic tree of the superphylum which contains a monophyletic clade comprising our three novel isolates as well as the GTDB taxa of uncultured MAGs UBA1135, UBA8108 and GCA-002687715 (Fig. 7a). The clusters formed by this tree are very similar to those proposed by the RpoB-based phylogenetic pattern.

Until today, there are no clear standards for the designation of higher bacterial taxa, but universal thresholds based on 16S rRNA sequence identity [66] have been introduced and were used within the PVC superphylum before [67]. When applying the proposed 75% minimal identity threshold to a planctomycetal identity matrix [47], we found that strains



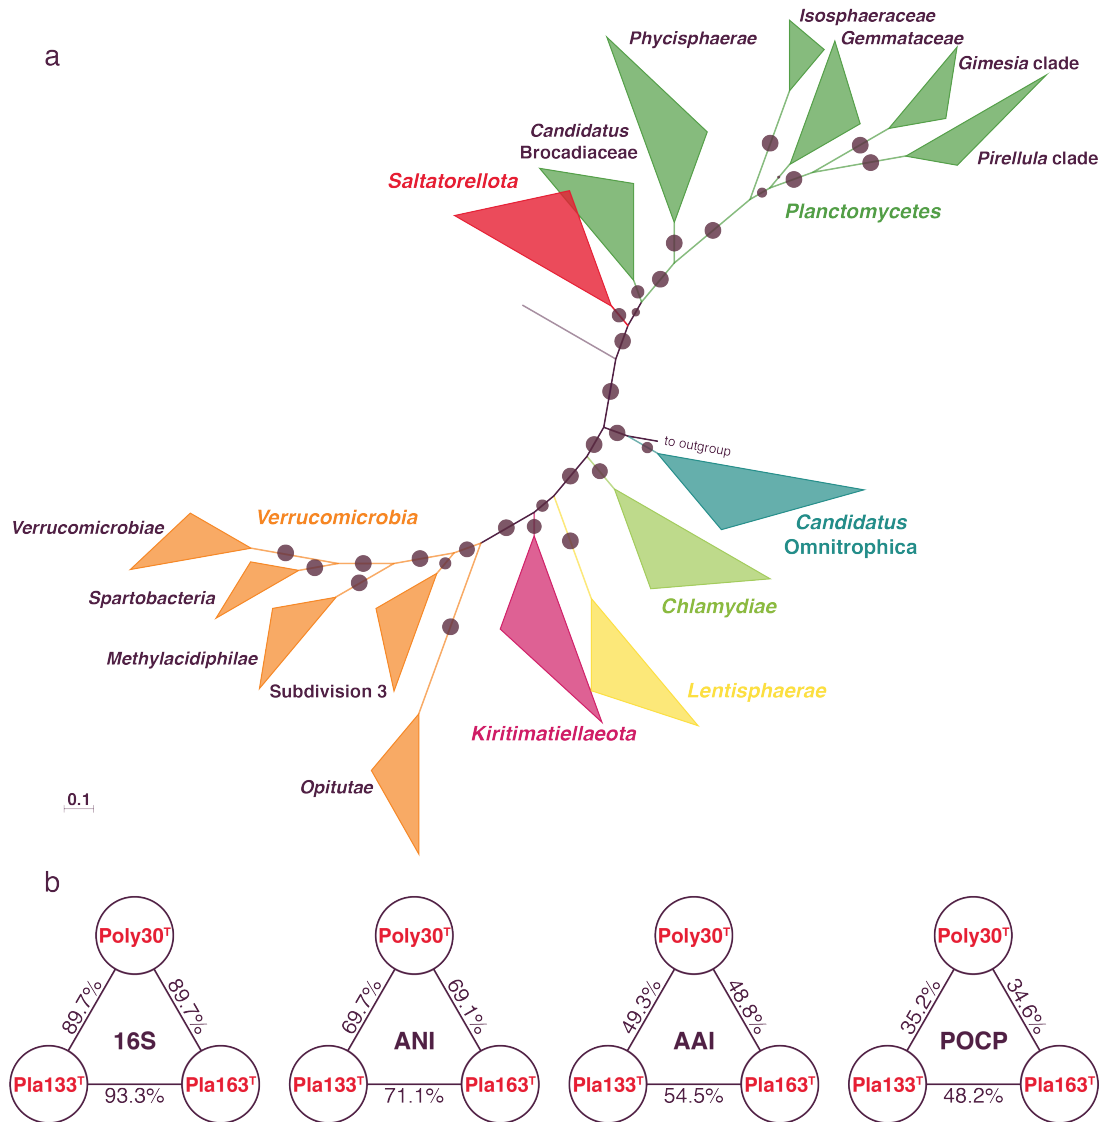

**Fig. 7. Phylogeny of the PVC superphylum and taxonomic rank determination of *Saltatorellota* strains Poly30<sup>T</sup>, Pla133<sup>T</sup> and Pla163<sup>T</sup>.** a) Maximum likelihood phylogeny of a genome-based alignment from 120 concatenated protein marker genes of 1675 genomes. The different colors indicate the different phyla of the PVC superphylum. Subclades of the phyla *Verrucomicrobia* and *Planctomycetes* are indicated by equal coloring. The circles indicate reliability estimators (between 0.121 - 1) based on Shimodaira-Hasegawa testing (see Material and Methods). b) (From left to right) 16S rRNA sequence identity values; whole genome-based *average nucleotide identity* (ANI) values; genome-encoded protein-based *average amino acid identity* (AAI) values; genome-encoded protein-based *percentage of conserved proteins* (POCP). 16S rRNA sequence identity values >86.5% and <94.5% indicate that the tested strains belong to the same taxonomic family. ANI values <95% suggest that the compared strains belong to at least different species and AAI values <60% and POCP values <50% suggest different genera.

Poly30<sup>T</sup>, Pla133<sup>T</sup> and Pla163<sup>T</sup> do not seem to belong to the phylum *Planctomycetes* (Table S5). They might rather be the first isolates of SILVA taxon OM190 that - by the given threshold - would represent a novel, independent phylum (Table S6). A more comprehensive, whole-genome approach is provided by the relative evolutionary divergence (RED) value that is based on concatenated protein phylogeny and is the foundation of the GTDB taxonomy [65]. In this context, a RED value of  $0.326 \pm 0.1$  is proposed to indicate the rank of phylum. In their newest GTDB release (R04-RS89), the authors suggest the phylum Planctomycetota with a RED value of 0.227 which would also contain our isolates. However, the RED value for the determined robust cluster comprising strains Poly30<sup>T</sup>, Pla133<sup>T</sup> and Pla163<sup>T</sup> as well as UBA1135, UBA8108 and GCA-002687715 (see above) is 0.307 (Fig. S10). In contrast to the Planctomycetota value, this result is very distinctively within the given phylum threshold, thereby maintaining parity with other bacterial taxa, and hence allows to split this cluster of to a phylum in its own right. Based on the 16S rRNA gene and whole-genome analyses, and in-line with the unusual traits observed in our three isolates, we suggest the novel phylum *Saltatorellota* which comprises the SILVA taxonomy phylum OM190 and the GTDB taxa UBA1135, UBA8108 and GCA-002687715 (Fig. S11). Interestingly, our calculations of 16S rRNA sequence identity and RED values imply that *Candidatus* Brocadiaceae as well as the class *Phycisphaerae* could also be transferred to novel phyla separate from the *Planctomycetes* (Table S7). However, this is beyond the scope of the present study.

To distinguish between lower taxa, 16S rRNA sequence identities can be used alongside average nucleotide identities (ANI), average amino acid identities (AAI) and the percentage of conserved proteins (POCP). For strains Poly30<sup>T</sup>, Pla133<sup>T</sup> and Pla163<sup>T</sup>, the determined values (Fig. 7b) imply that all three isolates belong to different species as well as different genera. This rating is seconded by 16S rRNA sequence identities, which additionally allow the conclusion that all strains belong to one taxonomic family.

On the basis of this phylogenetic analysis, we suggest that strains Poly30<sup>T</sup>, Pla133<sup>T</sup> and Pla163<sup>T</sup> represent novel species of novel genera for which we propose the names *Saltatorellus ferox* sp. nov, gen. nov., *Engelhardtia mirabilis* sp. nov, gen. nov and *Rohdeia mirabilis* sp. nov, gen. nov. With *Saltatorellus* being the type genus, all three genera belong to the family *Saltatorellaceae* within the new phylum *Saltatorellota* [68]. The *Saltatorellota* phylum comprises the SILVA taxonomy phylum OM190 and the GTDB taxa UBA1135, UBA8108 and GCA-002687715.

### **Description of *Saltatorellus* gen. nov.**

*Saltatorellus* (Sal.ta.to.rel'lus. N.L. masc. n., *Saltatorellus* dim. of L. saltator a dancer; a bacterium that occurs to be dancing). The type species of the genus is *Saltatorellus ferox*.

### **Description of *Saltatorellus ferox* sp. nov.**

*Saltatorellus ferox* (fe'rox. L. masc. adj. ferox boisterous, wild; corresponding to the wild movements of the cells). *Saltatorellus ferox* cells show amoeba-like locomotion and shapeshifting. If cells form large aggregates the formation of trunk-like structures was observed. Cell size is very variable from 0.8-3.5 µm with an average cell size of 1-1.3 µm (Fig. S12). The GC content is 67%. *Saltatorellus ferox* grows in a range of artificial seawater (ASW) between 10-100% with optimal growth between 25%-75%. NaCl of 0% and 1% was tolerated while at 2.5% and higher concentration no growth was observed. *Saltatorellus ferox* grows at temperatures between 15-33°C with optimal growth at 27 - 30°C. Cells showed similar growth at pH 7 and pH 7.5 while below and above these pH values no growth was observed.

The type species is strain Poly30<sup>T</sup> (= DSM 103386) isolated from polyethylene particles incubated near the shore of Heiligendamm, Germany in the Baltic Sea (54.146 N 11.843 E). The GenBank accession numbers are MK559991 for the 16S rRNA gene sequence and CP036434 for the genome sequence.

### **Description of *Rohdeia* gen. nov.**

*Rohdeia* (Roh.de'i.a. N.L. fem. n. Rohdeia, a bacterium named in honor of the German microbiologist and electron microscopist Manfred Rohde, who contributed significantly to the visualization of adhesion and invasion mechanisms of pathogenic bacteria, to the morphological characterization of bacteriophages and newly isolated bacteria, to the advancement of various TEM and SEM methods as well as to the cell biological characterization of the phylum *Planctomycetes*). *Rohdeia mirabilis* is the type species of this genus.

### **Description of *Rohdeia mirabilis* sp. nov.**

*Rohdeia mirabilis* (mi.ra'bi.lis. L. fem. adj. mirabilis marvelous, wonderful; corresponding to special attributes of the strain). *Rohdeia mirabilis* cells grow in huge aggregate of millimeter size. Its GC content is 70.5%. *Rohdeia mirabilis* growth in a temperature range of 20-30 °C with optimal growth at 27 °C.

The type species is strain Pla163<sup>T</sup> isolated from biofilms on incubated wood or plastic particles in the Baltic Sea near an inflowing river estuary at the coastline of Rostock (Hohe Düne), Germany (54.183 N 12.095 E). The GenBank accession numbers are MK559986 for the 16S rRNA gene sequence and CP036290 for the genome sequence.

### **Description of *Engelhardtia* gen. nov.**

*Engelhardtia* (En.gel.hard'ti.a. N.L. fem. n. Engelhardtia, named in honor of the German structural microbiologist Harald Engelhardt, who contributed significantly to the structural understanding of the archaeal and bacterial cell envelope, to the advancement of cryo-electron

tomography as well as to the cell biological characterization of the phylum *Planctomycetes*). *Engelhardtia mirabilis* is the type species of the genus.

**Description of *Engelhardtia mirabilis* sp. nov.**

*Engelhardtia mirabilis* (mi.ra'bi.lis. L. fem. adj. mirabilis marvelous, wonderful; corresponding to special attributes of the strain). *Engelhardtia mirabilis* cells are in average 0.8-1.3  $\mu\text{m}$  in diameter, but sizes can vary between 0.5-2.0  $\mu\text{m}$  (Fig. S12). They possess multiple interconnected cytoplasmic invaginations. Its GC-content is 70.3%. *Engelhardtia mirabilis* growth in a temperature range of 20-33  $^{\circ}\text{C}$  with optimal growth at 30  $^{\circ}\text{C}$ . It tolerates a pH range of 6.5 - 7.5 with optimal growth at pH 7.

The type species is strain Pla133<sup>T</sup> (= DSM 103766) isolated from polystyrene particles incubated at the Warnow river estuary in Rostock, Germany (54.106 N 12.096 E). The GenBank accession numbers are MK559985 for the 16S rRNA gene sequence and CP036287 and CP036288 for the genome sequences.

**Description of *Saltatorellaceae* fam. nov.**

*Saltatorellaceae* (Sal.ta.to.rel.la.ce'ae. N.L. masc. dim. n. *Saltatorellus*, type genus of the family; suff. -aceae, ending to denote a family; N.L. fem. pl. n. *Saltatorellaceae*, the *Saltatorellus* family). The type genus of the family is *Saltatorellus*.

**Description of *Saltatorellales* ord. nov.**

*Saltatorellales* (Sal.ta.to.rel.la'les. N.L. masc. dim. n. *Saltatorellus*, type genus of the order; suff. -ales, ending to denote an order; N.L. fem. pl. n. *Saltatorellales*, the *Saltatorellus* order). The type genus of the order is *Saltatorellus*.

**Description of *Saltatorellae* class nov.**

*Saltatorellae* (Sal.ta.to.rel'lae. N.L. masc. dim. n. *Saltatorellus*, type genus of the type order of the class; N.L. fem. pl. n. *Saltatorellae*, the class of the order *Saltatorellales*). The type order of the class is *Saltatorellales*.

**Description of *Saltatorellota* phyl. nov.**

*Saltatorellota* (Sal.ta.to.rell'ota. N.L. fem. pl. n. *Saltatorellae*, type class of the phylum; suff. -ota, ending to denote a phylum; N.L. neut. pl. n. *Saltatorellota*, the phylum of the class *Saltatorellae*). Based on a phylogenetic assessment, calculated from 120 ubiquitous single-copy proteins, the proposed phylum *Saltatorellota* forms a stable monophyletic lineage separated from the phylum *Planctomycetes*. Similar results were obtained for a RpoB -based phylogeny. While a 16S rRNA gene based phylogeny showed no reliable clustering, the 16S rRNA gene sequence identity between members of the proposed phylum *Saltatorellota* and the phylum *Planctomycetes* is below the recommended threshold of 75%, supporting separate phyla [66]. The proposed phylum *Saltatorellota* includes the uncultured GTDB taxa UBA1135, UBA8108 and GCA-002687715 and SILVA taxon OM190. The type class of the phylum is *Saltatorellae*.

## Conclusion

Some conclusions and evolutionary implications that one might think of when looking at the phylum *Saltatorellota* might parallel the historical view on the phylum *Planctomycetes* [2] that were once considered the ‘missing link’ between eukaryotes and prokaryotes/bacteria [2] - a claim we do not want to make in this manuscript. This is why we concentrated on the description of the novel phylum with a focus on controls such as determining the natural growth conditions. The work was performed in six independent research centers and all critical time-lapse analyses were done in parallel in two different laboratories employing two different experimental setups. Thus, we are confident in the significance of our observations. Nevertheless, given the history of the PVC superphylum - from the *Chlamydia* anomaly to the paradigm shift in planctomycetal cell biology – we will not speculate about potential evolutionary implications of our findings, but stress the need for further analysis requiring the development of genetic tools to reveal the molecular background of the observed traits.

## Materials and Methods

### Isolation, cultivation and physiological characterization of *Saltatorellota* strains

For the isolation of *E. mirabilis* Pla133<sup>T</sup> and *R. mirabilis* Pla163<sup>T</sup>, microplastic and wood particles collected on 04 September 2014 were incubated for 16 days in an inflowing river estuary and at the Baltic Sea coast as previously described [57]. *S. ferox* Poly30<sup>T</sup> was isolated from plastic particles collected on 08 October 2015 (incubation time two weeks) from the Baltic Sea at Heiligendamm pier, Germany. Details concerning isolation strategy and media were previously described [47].

All growth tests were measured in triplicates. Growth at pH 5-9 in 0.5 intervals was tested using 100 mM MES, HEPES, HEPPS or CHES buffer, corresponding to the individual buffer range. Growth was tested at 10, 15, 20, 22, 24, 27, 30, 33, 36 and 40 °C to identify the optimal growth temperature. The optimal salinity for *S. ferox* Poly30<sup>T</sup> was tested by inoculation of artificial seawater (ASW) at concentrations of 5%, 10% and 25-300% in 25% intervals to test if the strains are growing under hypersaline conditions. 50% ASW corresponds to 250 ml/L concentrated artificial sea water (46.94 g/L NaCl, 7.84 g/L Na<sub>2</sub>SO<sub>4</sub>, 21.28 g/L MgCl<sub>2</sub> x 6 H<sub>2</sub>O, 2.86 g/L CaCl<sub>2</sub> x 2 H<sub>2</sub>O, 0.384 g/L NaHCO<sub>3</sub>, 1.384 g/L KCl, 0.192 g/L KBr, 0.052 g/L H<sub>3</sub>BO<sub>3</sub>, 0.08 g/L SrCl<sub>2</sub> x 6 H<sub>2</sub>O and 0.006 g/L NaF). NaCl tolerance for *S. ferox* Poly30<sup>T</sup> was tested between 0-10% at 0%, 1%, 2.5%, 3.5%, 4% and in 1% intervals at higher concentrations. Therefore, medium with 50% ASW (standard cultivation conditions) was used and only the NaCl concentration was varied.

### Baltic Sea environmental sample collection along a salinity gradient

Near surface water samples (5m depth) for determination of *in situ* relative abundances of *Saltatorellota* were taken in Aug/Sep 2015 onboard the R/V Poseidon (cruise POS488) along the southern and eastern coastlines of the Baltic Sea, from Rostock, Germany to Helsinki, Finland (Fig. 5). Samples were collected in 5 L Free-Flow bottles (Hydro-Bios) mounted on a rosette equipped with a Conductivity-Temperature-Depth-probe (Sea-Bird SBE 9). Water from 5 - 6 Free-Flow bottles was mixed and filtered in technical triplicates (500 mL each) through a 3 µm pore-size cellulose nitrate filter (particle-attached fraction) and a 0.22 µm pore cellulose nitrate filter (both GE Whatman) to capture the free-living bacterial fraction. Filters were snap-frozen in liquid nitrogen and stored at -80 °C until further processing.

### DNA extraction, 16S rRNA-gene amplicon sequencing and sequence processing

DNA from the collected filter was extracted using the DNeasy PowerSoil Kit (Qiagen) according to the manufacturer's instructions, except that DNA was eluted twice from the spin column using the same 50 µL PCR-grade water. Amplification of DNA was conducted via polymerase chain reaction (PCR) using bacterial primers covering the V4-region of the 16S rRNA-gene (position 515F to 806R in *E. coli*) with the forward sequence 5' GTGCCAGCMGCCGCGGTAA 3' and reverse sequence 5' GGACTACHVGGGTW TCTAAT 3' [69] PCR conditions were as followed; initial denaturation at 98 °C for 2 min, followed by an additional denaturation step at 98 °C for 15 s, annealing at 65 °C for 15 s and elongation for 30 s at 68 °C. Steps 2 – 4 were repeated 9 times, with elongation temperature <

1 °C per cycle (linear amplification). After 9 cycles of linear amplification, this was followed by a denaturation step at 98 °C for 15 s, annealing at 55 °C for 15 s and elongation at 68 °C for 30 s for 24 cycles and a final elongation step at 70 °C for 5 min [70]. Library preparation and sequencing on an Illumina MiSeq machine were carried out according to the ‘Illumina 16S Metagenomic Sequencing Library Preparation Guide’ at the Institute of Medical Microbiology, Virology and Hygiene, University Medical Centre Rostock, Germany. Raw sequence reads are available from the NCBI Sequence Read Archive under the accession number PRJNA506548 (condition = *in situ*).

### **Sequence processing and filtering for sequences of cultivated *Saltatorellota* strains**

Obtained sequences were processed using the mothur-pipeline v. 1.39.5 [71]. Paired end reads were assembled, and quality filtered (permitted length = 250 – 275 bp, max. number of ambiguous bases per sequence = 0, max. number of homopolymers per sequence = 8). Sequences were classified using the Wang algorithm [72] (required bootstrap value of  $\geq 85\%$ ) and the SILVA SSURef release 132 as reference database [73], into which the sequences of the complete 16S rRNA gene of the strains Poly30\_41280, Pla163\_29910, and Pla133\_39970 (GenBank acc .no. MK559985, MK559986 and MK559991) had been included. Sequences classified as *Eukaryota*, *Archaea*, Chloroplasts, Mitochondria, and as unknown were excluded from the dataset. *Saltatorellota* sequences were extracted using the ‘get.lineages’ command in mothur and OTUs picked from the sequences at a 97% threshold. Finally, OTUs were classified, relative abundances calculated based on the library size of bacterial reads per sample, and mean abundances per station calculated for all *Saltatorellota* OTUs together. Mean relative abundances of particle-attached ( $> 3 \mu\text{m}$ ) *Saltatorellota* spp. at the different cruise stations were visualized using Ocean Data View (Schlitzer, R., Ocean Data View, odv.awi.de, 2018). Salinity values for the coastal zones were extrapolated from the measured *in situ* data within Ocean Data View using Data Interpolating Variational Analysis (DIVA) with default parameters. Salinity and relative abundance maps were merged using the graphical software Gimp v. 2.10.8.

### **Phylogenetic analysis of the PVC phylum and *Saltatorellota***

To resolve the placement of strains Pla163<sup>T</sup>, Pla133<sup>T</sup> and Poly30<sup>T</sup> within the phylogeny of the PVC superphylum by means of 16S and 23S rRNA-based analysis, alignments for this clade were obtained from the non-redundant SILVA SSU Ref NR 99 database, release 132 or the SILVA LSU Ref, release 132, respectively [73]. 16S and 23S rRNA sequences from the novel strains (GenBank acc .no. MK559985, MK559986 and MK559991) were aligned with SINA [74] and appended. Ten sequences derived from different *Proteobacteria*, *Firmicutes* and *Gemmatimonadetes* were used as outgroup. Different trees were determined by using different cut-off positions when cropping the alignment and by using a 50% identity filter. Maximum likelihood inference was calculated employing FastTree v2.1.10 [75] with the GTRGAMMA substitution model invoked. A subset alignment containing only sequences of SILVA taxonomy group OM190 and the three novel strains was created (positions 5295-41022). The maximum likelihood inference for these trees was derived by using RAxML [76] (1,000 bootstraps, model of nucleotide substitution: GTRGAMMAI). Ten sequences derived from different *Proteobacteria*, *Firmicutes* and *Gemmatimonadetes* and all planctomycetal 16S

rRNA sequences published recently by Wiegand *et al.* [47] were used as outgroup. An identity matrix of this alignment was created with ARB [77].

For the analyses based on whole genomes or single genes genome data were obtained from NCBI GenBank based on the NCBI Taxonomy database. All available genomes classified as members of the PVC phylum were downloaded on 7 January 2019. Completeness and contamination of all genomes was determined using CheckM v1.0.13 [78]. Only genomes with a completeness >50%, a contamination <10%, and a strain heterogeneity 0 were included in the following analyses. Additionally, all planctomycetal genomes (including the *Saltatorellota* genomes with GenBank acc. no. CP036287+CP036288, CP036290 and CP036434) sequenced by Wiegand *et al.* [47] were included and ten genomes from *Proteobacteria*, *Firmicutes* and *Gemmatimonadetes* served as outgroup.

Phylogenetic placements based on the marker protein RpoB were computed based on the aforementioned genomes from which RpoB protein sequences were extracted by using hmmer [79] together with the TIGR02013 alignment. The results were aligned with MUSCLE v.3.8.31 [80], the ends of the alignment were curated, and the phylogeny was inferred by maximum likelihood implemented in FastTree v2.1.10 [75] (WAG substitution model and gamma distributed rate heterogeneity enabled). An additional phylogeny was inferred from RpoB sequences only belonging to the three novel strains, one member of each potential planctomycetal genus [47] and three *Verrucomicrobia* as outgroup. For this smaller subset the alignment was made with Clustal Omega [81] and the phylogenetic tree was calculated with a) RAxML [76] and the WAG substitution model and gamma distributed rate heterogeneity enabled (1,000 bootstrapping resamples) and b) Bayesian inference as implemented in Mr Bayes [82] (rate variation model: invgamma, amino acid model: fixed(wag), single chain per analysis, number of generations: 300,000).

A genome-based alignment relying on marker gene sets was gained by employing GTDB-Tk v0.2.2 [65] (<https://github.com/ECogenomics/GtdbTk/>) with the 'identify' and 'align' option. The phylogeny was inferred with the maximum likelihood model implemented in FastTree v2.1.10 [75] (gamma distributed rate heterogeneity and Shimodaira-Hasegawa support values enabled) and using different amino acid substitution models to test for robustness (WAG, JTT and LG). For Fig. 7, the tree calculated with WAG substitution level was used. Each analysis was performed for all included sequences and for subsets, each with one taxon removed. RED values, that have also been introduced by Parks *et al.* [65], were determined by employing PhyloRank v0.0.37 (<https://github.com/dparks1134/PhyloRank>) on the above used alignment and the taxonomy file gained from GTDB-Tk. Editing the taxonomy file allowed to determine custom RED values for newly defined taxa.

A more custom approach, as used by Bartling *et al.* [83] and Vollmers *et al.* [33], to genome-based phylogeny that does not rely on marker genes was used for members of the above defined taxon comprising the novel strains Pla163<sup>T</sup>, Pla133<sup>T</sup> and Poly30<sup>T</sup>. In this analysis, three planctomycetal strains served as outgroup. The unique single-copy core genome of all genomes was determined with proteinortho5 [84] using the following parameters "-cov=55 -e=1e-5 -identity=25" and tolerating the absence of single-copy genes in up to two comparison genomes to account for partial draft genomes. The protein sequences of the resulting orthologous groups were aligned using MUSCLE v.3.8.31 [80]. After clipping partially aligned C- and N-terminal trailing regions, poorly aligned internal alignment regions were subsequently filtered using



Gblocks [85]. To reduce influence from potential horizontal gene transfer events, each orthologous group was then preliminarily clustered using FastTree v2.1.10 [75], and the resulting tree topologies were compared with respect to the observed summed phylogenetic distances. Markers which produced tree topologies with summed phylogenetic distances larger than the mean for all orthologous groups plus two standard deviations were dismissed. The final selection of seven marker alignments with a combined length of 1392 conserved amino acid residues was concatenated and clustered using the maximum likelihood method implemented by RAxML [76] with the "rapid bootstrap" method and 100 bootstrap replicates. To generate similarity matrices, the average amino acid (AAI) was gained with the *aai.rb* script of the *enveomics* collection [86], the average nucleotide identity (ANI) was determined by OrthoAni [87] and the percentage of conserved proteins (POCP) was calculated as described by Qin *et al.* [88]. All trees were collapsed and formatted with iTOL v4 [89].

### **Presence of genes involved in swimming, twitching, gliding and sliding motility**

The targets for the analysis were chosen from literature [58, 63, 90-96]. (Pfam [97] and TIGRFAM [98] identifiers were gathered for all genes from the UniProt database [99] (Table S2). Profile Hidden Markov Models (HMM) were computed from Pfam rp55 and TIGRFAM seed alignments with *hmmbuild* [79]. The profile HMMs were then used to search genomes of strains Pla133<sup>T</sup>, Pla163<sup>T</sup> and Poly30<sup>T</sup> with *hmmsearch* [79]. Gene clusters with potential hits were gathered and locally re-evaluated with InterProScan [100]. The results were manually curated (Table S2) and transferred into Fig. S4 and S5 and Table S3.

### **Analysis of motor protein-homologs**

The targets for the analysis were the eukaryotic motor proteins myosin (PF00063), kinesin (PF00225) and dynamin (PF00350). Profile Hidden Markov Models (HMM) were computed from the Pfam rp55 seed alignments with *hmmbuild* [79]. The profile HMMs were then used to search genomes of strains Pla133<sup>T</sup>, Pla163<sup>T</sup> and Poly30<sup>T</sup> with *hmmsearch* [79].

### **Phylogeny of bacterial actin homologs**

For determining the phylogeny of bacterial actin homologs such as MreB, HMM profiles built with the sequences found by Derman *et al.* [101] was used for a *hmmsearch* [79] analysis against all sequences in the BLAST nr database (June 2018). Additionally, a BLASTp analysis of all sequences was conducted against the BLAST nr database. The results were merged, deduplicated and chaperone DnaK (*E. coli*) and ribulokinase AraB (*E. coli*) were blasted (BLASTp) against them. This was done as both proteins show similarities to the actin homologs but do not form filaments themselves (see for example CDD-Acc. cd00012 [102]). All hits that had better hits against DnaK or AraB were removed. The remaining sequences were used as query sequences in a DIAMOND [103] analysis against the BLAST nr database. Again, the results were deduplicated and DnaK and AraB hits were removed. The process was repeated for another two cycles.

All sequences <100 aa or >800 aa were removed from the resulting amino acid sequence file (48443 entries). Subsequently, the sequences were clustered with USEARCH [104] and an identity threshold of 50% ('-sort length' option enabled). The representative sequences of each cluster were aligned with MAFFT [105] (with the '--retree 2' and '--maxiterate 0' options

enabled) together with reference sequences: the amino acid sequences from Derman *et al.* [101], all planctomycetal actin homolog hits (see Wiegand *et al.* [47]), DnaK, AraB and DnaA as outgroup. A phylogenetic tree was built with FastTree2 [75]. One subset of the tree was chosen and the sequences as well as all sequences from their respective USEARCH clusters were extracted. With this gene set, a second iteration was started as described above (with an USERACH identity threshold of 75% and ‘-sort’ option disabled). A third (with an USERACH identity threshold of 85% and ‘-sort’ option disabled) and a fourth (with an USERACH identity threshold of 85% and ‘-sort length’ option enabled, additional amino acid sequences of Mollicutes *mreBs* as reference) refinement followed.

### **GC-MS analysis of diaminopimelic acid from *Saltatorellota* cells**

Detection was performed as previously described [38]. In brief, cells were harvested from 6 - 20 mL cultures by centrifugation, lyophilized, hydrolyzed (200  $\mu$ l 4 N HCl, 100 °C, 16 h) and dried in a vacuum desiccator. Amino acids derivatized to N-heptafluorobutyryl isobutylesters [106] were resolved in ethyl acetate and analyzed by GC/MS (Singlequad 320, Varian; electron impact ionization, scan range 60 to 800 m/z). The derivatized diaminopimelic acid was detected in Extracted Ion Chromatograms (EIC) using the characteristic fragment ion set 380, 324, 306 and 278 m/z at a retention time of 23.5 – 23.55 min.

### **TEM and SEM of *Saltatorellota* cells and sacculi**

For field emission scanning electron microscopy (FESEM) *Saltatorellota* cells were fixed in 1% formaldehyde in HEPES buffer (3 mM HEPES, 0.3 mM CaCl<sub>2</sub>, 0.3 mM MgCl<sub>2</sub>, 2.7 mM sucrose, pH 6.9) for 1 h on ice and washed one time with HEPES buffer. Cover slips with a diameter of 12 mm were coated with a poly-L-lysine solution (Sigma-Aldrich) for 10 min, washed in distilled water and air-dried. 50  $\mu$ l of the fixed bacteria solution was placed on a cover slip and allowed to settle for 10 min. Cover slips were then fixed in 1% glutaraldehyde in TE buffer (20 mM TRIS, 1 mM EDTA, pH 6.9) for 5 min at room temperature and subsequently washed twice with TE-buffer before dehydrating in a graded series of acetone (10, 30, 50, 70, 90, 100%) on ice for 10 min at each concentration. Samples from the 100% acetone step were brought to room temperature before placing them in fresh 100% acetone. Samples were then subjected to critical-point drying with liquid CO<sub>2</sub> (CPD 300, Leica). Dried samples were covered with a gold/palladium (80/20) film by sputter coating (SCD 500, Bal-Tec) before examination in a field emission scanning electron microscope (Zeiss Merlin) using the Everhart Thornley HESE2-detector and the inlens SE-detector in a 25:75 ratio at an acceleration voltage of 5 kV.

Cell pellets were resuspended in 10 mL 10 % SDS (w/v) and boiled for three hours. Sacculi were harvested (30 min, 139 699 x g, 4 °C; SW 60 Ti rotor, Beckman Coulter), washed 4 times in 3 mL water and resuspended in 1 mL water supplemented with 0.02% (w/v) sodium azide. TEM micrographs of murein sacculi were taken after negatively staining with 2% aqueous uranyl acetate, employing a Zeiss transmission electron microscope EM 910 at an acceleration voltage of 80 kV at calibrated magnifications as previously described [107].

### **Cryo-electron tomography of *Engelhardtia mirabilis* Pla133<sup>T</sup>**

Cells of strain Pla133<sup>T</sup> were mixed with the same volume of BSA-stabilized 15 nm colloidal gold solution (Aurion) and placed on holey carbon-coated 200 mesh copper grids (R2/1, Quantifoil, Jena, Germany) immediately before thin-film vitrification by plunge-freezing in liquid propane (63%)/ethane (37%) [108]. Typically, grids with frozen-hydrated samples were mounted in Autogrids [109]. Tomographic tilt series were recorded under low dose conditions (total dose typically  $<150 \text{ e}/\text{\AA}^2$ ) on a Titan Krios (FEI, Eindhoven, The Netherlands) equipped with a Bioquantum post-column energy filter with a K2 Summit direct electron detector (Gatan, Pleasanton, CA, USA). At each tilt, dose fractionation mode was employed, and 8 frames of each projection were sampled, which were then aligned to compensate for beam-induced object drift using MotionCor2 [110]. Typically, tilt series were recorded at a nominal defocus of -5 or -6  $\mu\text{m}$ , and a primary magnification of 33000 x (corresponding to pixel sizes on the object level of 0.43 nm and covered an angular range of  $\pm 60^\circ$  in increments of  $2^\circ$ ). IMOD [111] was used for 3D reconstruction.

### **Time-lapse Microscopy of *Saltatorellota* cells and cell aggregates**

Given the very unusual observations we made, time-lapse experiments were performed in two independent laboratories with distinct experimental settings and from two independent investigators to double check all results.

In Nijmegen, 2  $\mu\text{L}$  of culture were added to the glass bottom of a Nunc Glass Base Dish. Cells were immobilized using a 1% agarose cushion consisting of M3H NAG ASW no SL10 medium and agarose. The sample was sealed using Vaseline. For imaging, environmental control was set to 28 °C. Pictures were taken every 5 minutes for a total of 24 h with a Leica DMI8 S inverse microscope using a HC PL APO 100x/1.40 OIL objective.

In Braunschweig, time-lapse microscopy was performed as described before [112]. Briefly, 2  $\mu\text{L}$  of Poly30<sup>T</sup> and Pla133<sup>T</sup> cells of an exponentially growing culture were immobilized on a 1% agarose-pad, containing M1HNAGASW (without sl10) medium and were imaged in a MatTek Glass Bottom Microwell Dish (35 mm dish, 14 mm Microwell with No. 1.5 cover-glass P35G-1.5-14-C). Images were taken with phase-contrast illumination using a NikonTi microscope with a Nikon N Plan Apochromat  $\lambda$  100x/1.45 Oil objective and the ORCA-Flash 4.0 Hamamatsu or RI2 cameras. Cell growth, locomotion, cell division and pili formation were observed every 5 min for up to 48 h at 28°C. Micrographs were subsequently aligned and analyzed using the NIS-Elements imaging software V 4.3 (Nikon).

### **Heterologous expression and florescent microscopy of the mCherry tagged MamK-like protein from strain Poly30<sup>T</sup>**

*E. coli* strain WM3064 (W. Metcalf, unpublished) was cultivated in lysogeny broth (LB) medium supplemented with 1 mM DL- $\alpha$ ,  $\epsilon$ -diaminopimelic acid (DAP) at 37 °C and shaking (180 rpm). A *MamK*-deleted mutant strain of *M. gryphiswaldense* [113] was cultivated microaerobically at 28 °C in modified flask standard medium (FSM) [114]. For the selection of strains carrying recombinant plasmids, media were supplemented with 25  $\mu\text{g}/\text{mL}$  kanamycin for *E. coli* WM3064 and 5  $\mu\text{g}/\text{mL}$  for *M. gryphiswaldense*. 1.5% (w/v) agar was added for solid medium.

Oligonucleotides used for the construction of plasmid pBBR1- $P_{tet}$ -mCherry::*mamK*-like<sub>Poly30</sub> were purchased from Sigma-Aldrich (Steinheim, Germany). The *MamK*-like gene from strain Poly30<sup>T</sup> was amplified by standard PCR procedures with Phusion DNA polymerase (Thermo Scientific) using the primers RPA821\_NheI (CTAGGCTAGCATGACCGACATCACGACCGAC) and RPA822\_BamHI (CGCGGATCCTCACTTGAGCTGCTCCCAGTAG). The digested PCR product was ligated with plasmid pBBR1- $P_{tet}$ -mCherry (pAP160 modified with mCherry [115]) containing inducible promoter  $P_{tet}$  digested with same enzymes, yielding pBBR1- $P_{tet}$ -mCherry::*mamK*-like<sub>Poly30</sub>. The sequence-verified (Macrogen Europe, Amsterdam, Netherlands) construct was introduced into chemically competent *E. coli* WM3064 following the standard procedure. *E. coli* WM3064 was used as a donor to transfer a recombinant plasmid into  $\Delta$ *mamK* strain of *M. gryphiswaldense* by conjugation as described earlier [116].

For induction experiments, media were supplemented with 100 ng/mL anhydrotetracycline (Atet).  $\Delta$ *mamK* of *M. gryphiswaldense* harboring pBBR1- $P_{tet}$ -mCherry::*mamK*-like<sub>Poly30</sub> was grown under an undefined microoxic condition in 15 mL polypropylene tubes with sealed caps in a culture volume of 10 mL to early mid-log phase. *E. coli* WM3064 with pBBR1- $P_{tet}$ -mCherry::*mamK*-like<sub>Poly30</sub> was grown under aerobic condition in a 50 mL Erlenmeyer flask with 10 mL culture volume. After 6 h of induction, 5  $\mu$ L of cell culture was fixed on a 'MSR-agarose pad' [63] and covered with a coverslip. Fluorescence microscopy of immobilized cells was performed with an Olympus BX81 microscope equipped with a 100X UPLSAPO100XO objective (with a numerical aperture of 1.40) and an Orca-ER camera (Hamamatsu). Images were analyzed and prepared with ImageJ Fiji v1.50c [117].

### **Acknowledgment**

We thank Anja Heuer for skillful technical assistance in cultivation and Ina Schleicher for help with the electron microscopic preparations for FSEM and negative-staining. We further thank the captain and crew of the R/V Poseidon cruise POS488 and Bernd Kreikemeyer (Medical Microbiology, Virology and Hygiene, University Medical Centre Rostock, Germany) for providing sequencing opportunities. The technical assistance of Jana Bull for preparation of sequencing runs is greatly acknowledged.

### **Funding**

Funding was kindly provided by the Deutsche Forschungsgemeinschaft JO893/4-1 and NOW Siam 024002002.

### **Competing interests**

Authors declare no competing interests.

### **Data and materials availability**

All data is available in the main text or the supplementary materials.

## References

1. Wagner M, Horn M: **The *Planctomycetes*, *Verrucomicrobia*, *Chlamydiae* and sister phyla comprise a superphylum with biotechnological and medical relevance.** *Curr Opin Biotechnol* 2006, **17**(3):241-249.
2. Wiegand S, Jogler M, Jogler C: **On the maverick *Planctomycetes*.** *FEMS Microbiol Rev* 2018, **42**(6):739–760.
3. Pilhofer M, Rappl K, Eckl C, Bauer AP, Ludwig W, Schleifer KH, Petroni G: **Characterization and evolution of cell division and cell wall synthesis genes in the bacterial phyla *Verrucomicrobia*, *Lentisphaerae*, *Chlamydiae*, and *Planctomycetes* and phylogenetic comparison with rRNA genes.** *J Bacteriol* 2008, **190**(9):3192-3202.
4. Moulder JW: **Why is *Chlamydia* sensitive to penicillin in the absence of peptidoglycan?** *Infect Agents Dis* 1993, **2**(2):87-99.
5. Chopra I, Storey C, Falla TJ, Pearce JH: **Antibiotics, peptidoglycan synthesis and genomics: the chlamydial anomaly revisited.** *Microbiol Mol Biol R* 1998, **144**(Pt 10):2673-2678.
6. McCoy AJ, Maurelli AT: **Building the invisible wall: updating the chlamydial peptidoglycan anomaly.** *Trends Microbiol* 2006, **14**(2):70-77.
7. Liehti GW, Kuru E, Hall E, Kalinda A, Brun YV, VanNieuwenhze M, Maurelli AT: **A new metabolic cell-wall labelling method reveals peptidoglycan in *Chlamydia trachomatis*.** *Nature* 2014, **506**(7489):507-510.
8. Packiam M, Weinrick B, Jacobs Jr. WR, Maurelli AT: **Structural characterization of muropeptides from *Chlamydia trachomatis* peptidoglycan by mass spectrometry resolves “chlamydial anomaly”.** *Proc Natl Acad Sci U S A* 2015, **112**(37):11660-11665.
9. Jacquier N, Viollier PH, Greub G: **The role of peptidoglycan in chlamydial cell division: towards resolving the chlamydial anomaly.** *FEMS Microbiol Rev* 2015, **39**(2):262-275.
10. Pilhofer M, Aistleitner K, Biboy J, Gray J, Kuru E, Hall E, Brun YV, VanNieuwenhze MS, Vollmer W, Horn M *et al*: **Discovery of chlamydial peptidoglycan reveals bacteria with murein sacculi but without FtsZ.** *Nat Commun* 2013, **4**:2856.
11. Abdelrahman Y, Ouellette SP, Belland RJ, Cox JV: **Polarized Cell Division of *Chlamydia trachomatis*.** *PLoS Pathog* 2016, **12**(8):e1005822.
12. Liehti G, Kuru E, Packiam M, Hsu YP, Tekkam S, Hall E, Rittichier JT, VanNieuwenhze M, Brun YV, Maurelli AT: **Pathogenic *Chlamydia* Lack a Classical Sacculus but Synthesize a Narrow, Mid-cell Peptidoglycan Ring, Regulated by MreB, for Cell Division.** *PLoS Pathog* 2016, **12**(5):e1005590.
13. Horn M: ***Chlamydiae* as symbionts in eukaryotes.** *Annu Rev Microbiol* 2008, **62**:113-131.
14. Schlesner H: ***Verrucomicrobium spinosum* gen. nov., sp. nov.: a Fimbriated Prosthecate Bacterium.** *Sys Appl Microbiol* 1987, **10**(1):54-56.
15. Derrien M, Vaughan EE, Plugge CM, de Vos WM: ***Akkermansia muciniphila* gen. nov., sp. nov., a human intestinal mucin-degrading bacterium.** *Int J Syst Evol Microbiol* 2004, **54**(Pt 5):1469-1476.
16. Gomez-Gallego C, Pohl S, Salminen S, De Vos WM, Kneifel W: ***Akkermansia muciniphila*: a novel functional microbe with probiotic properties.** *Benef Microbes* 2016, **7**(4):571-584.
17. Everard A, Belzer C, Geurts L, Ouwerkerk JP, Druart C, Bindels LB, Guiot Y, Derrien M, Muccioli GG, Delzenne NM *et al*: **Cross-talk between *Akkermansia muciniphila***

- and intestinal epithelium controls diet-induced obesity.** *Proc Natl Acad Sci U S A* 2013, **110**(22):9066-9071.
18. Everard A, Plovier H, Rastelli M, Van Hul M, de Wouters d'Oplinter A, Geurts L, Druart C, Robine S, Delzenne NM, Muccioli GG *et al*: **Intestinal epithelial N-acetylphosphatidylethanolamine phospholipase D links dietary fat to metabolic adaptations in obesity and steatosis.** *Nat Commun* 2019, **10**(1):457.
  19. Plovier H, Everard A, Druart C, Depommier C, Van Hul M, Geurts L, Chilloux J, Ottman N, Duparc T, Lichtenstein L *et al*: **A purified membrane protein from *Akkermansia muciniphila* or the pasteurized bacterium improves metabolism in obese and diabetic mice.** *Nat Med* 2017, **23**(1):107-113.
  20. Routy B, Le Chatelier E, Derosa L, Duong CPM, Alou MT, Daillere R, Fluckiger A, Messaoudene M, Rauber C, Roberti MP *et al*: **Gut microbiome influences efficacy of PD-1-based immunotherapy against epithelial tumors.** *Science* 2018, **359**(6371):91-97.
  21. Pol A, Heijmans K, Harhangi HR, Tedesco D, Jetten MS, Op den Camp HJ: **Methanotrophy below pH 1 by a new Verrucomicrobia species.** *Nature* 2007, **450**(7171):874-878.
  22. Dunfield PF, Yuryev A, Senin P, Smirnova AV, Stott MB, Hou S, Ly B, Saw JH, Zhou Z, Ren Y *et al*: **Methane oxidation by an extremely acidophilic bacterium of the phylum Verrucomicrobia.** *Nature* 2007, **450**(7171):879-882.
  23. Mohammadi S, Pol A, van Alen TA, Jetten MS, Op den Camp HJ: ***Methylacidiphilum fumariolicum* SolV, a thermoacidophilic 'Knallgas' methanotroph with both an oxygen-sensitive and -insensitive hydrogenase.** *ISME J* 2017, **11**(4):945-958.
  24. Rast P, Glockner I, Boedeker C, Jeske O, Wiegand S, Reinhardt R, Schumann P, Rohde M, Spring S, Glockner FO *et al*: **Three Novel Species with Peptidoglycan Cell Walls form the New Genus *Lacunisphaera* gen. nov. in the Family Opitutaceae of the Verrucomicrobial Subdivision 4.** *Front Microbiol* 2017, **8**:202.
  25. Pilhofer M, Rosati G, Ludwig W, Schleifer KH, Petroni G: **Coexistence of tubulins and *ftsZ* in different *Prostheco bacter* species.** *Mol Biol Evol* 2007, **24**(7):1439-1442.
  26. Strous M, Fuerst JA, Kramer EH, Logemann S, Muyzer G, van de Pas-Schoonen KT, Webb R, Kuenen JG, Jetten MS: **Missing lithotroph identified as new planctomycete.** *Nature* 1999, **400**(6743):446-449.
  27. Peeters SH, van Niftrik L: **Trending topics and open questions in anaerobic ammonium oxidation.** *Curr Opin Chem Biol* 2018, **49**:45-52.
  28. Bengtsson MM, Sjøtun K, Lanzén A, Øvreås L: **Bacterial diversity in relation to secondary production and succession on surfaces of the kelp *Laminaria hyperborea*.** *ISME J* 2012, **6**(12):2188-2198.
  29. Bondoso J, Godoy-Vitorino F, Balague V, Gasol JM, Harder J, Lage OM: **Epiphytic Planctomycetes communities associated with three main groups of macroalgae.** *FEMS Microbiol Ecol* 2017, **93**(3):f1w255.
  30. Bondoso J, Albuquerque L, Nobre MF, Lobo-da-Cunha A, da Costa MS, Lage OM: ***Roseimaritima ulvae* gen. nov., sp. nov. and *Rubripirellula obstinata* gen. nov., sp. nov. two novel planctomycetes isolated from the epiphytic community of macroalgae.** *Syst Appl Microbiol* 2015, **38**(1):8-15.
  31. Bondoso J, Balague V, Gasol JM, Lage OM: **Community composition of the Planctomycetes associated with different macroalgae.** *FEMS Microbiol Ecol* 2014, **88**(3):445-456.
  32. Lage OM, Bondoso J: **Planctomycetes and macroalgae, a striking association.** *Front Microbiol* 2014, **5**:267.

33. Vollmers J, Frentrup M, Rast P, Jogler C, Kaster AK: **Untangling Genomes of Novel Planctomycetal and Verrucomicrobial Species from Monterey Bay Kelp Forest Metagenomes by Refined Binning.** *Front Microbiol* 2017, **8**:472.
34. Bengtsson MM, Øvreås L: **Planctomyces dominate biofilms on surfaces of the kelp *Laminaria hyperborea*.** *BMC Microbiol* 2010, **10**:261.
35. Jeske O, Jogler M, Petersen J, Sikorski J, Jogler C: **From genome mining to phenotypic microarrays: Planctomyces as source for novel bioactive molecules.** *Antonie Van Leeuwenhoek* 2013, **104**(4):551-567.
36. Lachnit T, Fischer M, Kunzel S, Baines JF, Harder T: **Compounds associated with algal surfaces mediate epiphytic colonization of the marine macroalga *Fucus vesiculosus*.** *FEMS Microbiol Ecol* 2013, **84**(2):411-420.
37. van Teeseling MC, Mesman RJ, Kuru E, Espaillat A, Cava F, Brun YV, VanNieuwenhze MS, Kartal B, van Niftrik L: **Anammox Planctomyces have a peptidoglycan cell wall.** *Nat Commun* 2015, **6**:6878.
38. Jeske O, Schüler M, Schumann P, Schneider A, Boedeker C, Jogler M, Bollschweiler D, Rohde M, Mayer C, Engelhardt H *et al*: **Planctomyces do possess a peptidoglycan cell wall.** *Nat Commun* 2015, **6**:7116.
39. Neumann S, Wessels HJ, Rijpstra WI, Sinninghe Damste JS, Kartal B, Jetten MS, van Niftrik L: **Isolation and characterization of a prokaryotic cell organelle from the anammox bacterium *Kuenenia stuttgartiensis*.** *Mol Microbiol* 2014, **94**(4):794-802.
40. Jogler C: **The bacterial 'mitochondrion'.** *Mol Microbiol* 2014, **94**(4):751-755.
41. Boedeker C, Schüler M, Reintjes G, Jeske O, van Teeseling MC, Jogler M, Rast P, Borchert D, Devos DP, Kucklick M *et al*: **Determining the bacterial cell biology of Planctomyces.** *Nat Commun* 2017, **8**:14853.
42. Acehan D, Santarella-Mellwig R, Devos DP: **A bacterial tubulovesicular network.** *J Cell Sci* 2013, **127**(Pt 2):277-280.
43. Santarella-Mellwig R, Pruggnaller S, Roos N, Mattaj IW, Devos DP: **Three-dimensional reconstruction of bacteria with a complex endomembrane system.** *PLoS Biol* 2013, **11**(5):e1001565.
44. Devos DP: **Re-interpretation of the evidence for the PVC cell plan supports a Gram-negative origin.** *Antonie Van Leeuwenhoek* 2014, **105**(2):271-274.
45. Devos DP: **PVC bacteria: variation of, but not exception to, the Gram-negative cell plan.** *Trends Microbiol* 2014, **22**(1):14-20.
46. Jogler C, Waldmann J, Huang X, Jogler M, Glöckner FO, Mascher T, Kolter R: **Identification of proteins likely to be involved in morphogenesis, cell division, and signal transduction in Planctomyces by comparative genomics.** *J Bacteriol* 2012, **194**(23):6419-6430.
47. Wiegand S, Jogler M, Boedeker C, Pinto D, Vollmers J, Rivas-Marín E, Kohn T, Peeters SH, Heuer A, Rast P *et al*: **Cultivation and functional characterization of 79 Planctomyces uncovers their unique biology.** *Nat Microbiol*, doi:10.1038/s41564-019-0588-1.
48. Jogler C, Glöckner FO, Kolter R: **Characterization of *Planctomyces limnophilus* and development of genetic tools for its manipulation establish it as a model species for the phylum Planctomyces.** *Appl Environ Microbiol* 2011, **77**(16):5826-5829.
49. Lovering AL, Safadi SS, Strynadka NC: **Structural perspective of peptidoglycan biosynthesis and assembly.** *Annu Rev Biochem* 2012, **81**:451-478.
50. Vollmer W, Holtje JV: **The architecture of the murein (peptidoglycan) in gram-negative bacteria: vertical scaffold or horizontal layer(s)?** *J Bacteriol* 2004, **186**(18):5978-5987.



51. Bayer ME: **Zones of membrane adhesion in the cryofixed envelope of *Escherichia coli***. *J Struct Biol* 1991, **107**(3):268-280.
52. Egan AJ, Vollmer W: **The physiology of bacterial cell division**. *Ann NY Acad Sci* 2013, **1277**:8-28.
53. Mercier R, Kawai Y, Errington J: **General principles for the formation and proliferation of a wall-free (L-form) state in bacteria**. *eLife* 2014.
54. Errington J: **L-form bacteria, cell walls and the origins of life**. *Open Biol* 2013, **3**(1):120143.
55. Leaver M, Dominguez-Cuevas P, Coxhead JM, Daniel RA, Errington J: **Life without a wall or division machine in *Bacillus subtilis***. *Nature* 2009, **457**(7231):849-853.
56. Razin S: **The Genus *Mycoplasma* and Related Genera (Class Mollicutes)**. In: *The Prokaryotes*. Edited by Dworkin M, Falkow S, Rosenberg E, Schleifer K-H, Stackebrandt E, 3 edn: Springer US; 2006: 836-904.
57. Oberbeckmann S, Kreikemeyer B, Labrenz M: **Environmental Factors Support the Formation of Specific Bacterial Assemblages on Microplastics**. *Front Microbiol* 2018, **8**:2709.
58. Jarrell KF, McBride MJ: **The surprisingly diverse ways that prokaryotes move**. *Nat Rev Microbiol* 2008, **6**(6):466-476.
59. Craig L, Forest KT, Maier B: **Type IV pili: dynamics, biophysics and functional consequences**. *Nat Rev Microbiol* 2019, **17**:429-440
60. Henrichsen J: **Bacterial surface translocation: a survey and a classification**. *Bacteriol Rev* 1972, **36**(4):478-503.
61. Berry JL, Pelicic V: **Exceptionally widespread nanomachines composed of type IV pilins: the prokaryotic Swiss Army knives**. *FEMS Microbiol Rev* 2015, **39**(1):134-154.
62. Jogler C, Schüler D: **New findings on magnetic organelles: Genetics and cell biology of magnetosome formation in magnetotactic bacteria**. *Annu Rev Microbiol* 2009, **63**:501-521.
63. Toro-Nahuelpan M, Muller FD, Klumpp S, Plitzko JM, Bramkamp M, Schüler D: **Segregation of prokaryotic magnetosomes organelles is driven by treadmilling of a dynamic actin-like MamK filament**. *BMC Biol* 2016, **14**(1):88.
64. Quast C, Pruesse E, Yilmaz P, Gerken J, Schweer T, Yarza P, Peplies J, Glöckner FO: **The SILVA ribosomal RNA gene database project: improved data processing and web-based tools**. *Nucleic Acids Res* 2013, **41**(D1):D590-D596.
65. Parks DH, Chuvochina M, Waite DW, Rinke C, Skarshewski A, Chaumeil P-A, Hugenholtz P: **A standardized bacterial taxonomy based on genome phylogeny substantially revises the tree of life**. *Nat Biotechnol* 2018, **36**:996-1004.
66. Yarza P, Yilmaz P, Pruesse E, Glöckner FO, Ludwig W, Schleifer KH, Whitman WB, Euzéby J, Amann R, Rossello-Mora R: **Uniting the classification of cultured and uncultured bacteria and archaea using 16S rRNA gene sequences**. *Nat Rev Microbiol* 2014, **12**(9):635-645.
67. Spring S, Bunk B, Sproer C, Schumann P, Rohde M, Tindall BJ, Klenk HP: **Characterization of the first cultured representative of *Verrucomicrobia* subdivision 5 indicates the proposal of a novel phylum**. *ISME J* 2016, **10**(12):2801-2816.
68. Whitman WB, Oren A, Chuvochina M, da Costa MS, Garrity GM, Rainey FA, Rossello-Mora R, Schink B, Sutcliffe I, Trujillo ME *et al*: **Proposal of the suffix -ota to denote phyla. Addendum to 'Proposal to include the rank of phylum in the International Code of Nomenclature of Prokaryotes'**. *Int J Syst Evol Microbiol* 2018, **68**:967-969.
69. Caporaso JG, Lauber CL, Walters WA, Berg-Lyons D, Lozupone CA, Turnbaugh PJ: **Global patterns of 16S rRNA diversity at a depth of millions of sequences per sample**. *Proc Natl Acad Sci U S A* 2011, **108**:4516-4522.

70. Takahashi S, Tomita J, Nishioka K, Hisada T, Nishijima M: **Development of a prokaryotic universal primer for simultaneous analysis of Bacteria and Archaea using next-generation sequencing.** *PLoS One* 2014, **9**(8):e105592.
71. Schloss PD, Westcott SL, Ryabin T, Hall JR, Hartmann M, Hollister EB, Lesniewski RA, Oakley BB, Parks DH, Robinson CJ *et al*: **Introducing mothur: open-source platform-independent community-supported software for describing and comparing microbial communities.** *App Environ Microbiol* 2009, **75**:7537–7541.
72. Wang Q, Garrity GM, Tiedje JM, Cole JR: **Naïve Bayesian Classifier for Rapid Assignment of rRNA Sequences into the New Bacterial Taxonomy.** *Appl Environ Microbiol* 2007, **73**(16):5261-5267.
73. Yilmaz P, Parfrey LW, Yarza P, Gerken J, Pruesse E, Quast C, Schweer T, Peplies J, Ludwig T, Glöckner FO: **The SILVA and "All-species Living Tree Project (LTP)" taxonomic frameworks.** *Nucleic Acids Res* 2014, **42**:643-648.
74. Pruesse E, Peplies J, Glöckner FO: **SINA: accurate high-throughput multiple sequence alignment of ribosomal RNA genes.** *Bioinformatics* 2012, **28**(14):1823-1829.
75. Price MN, Dehal PS, Arkin AP: **FastTree 2 – Approximately Maximum-Likelihood Trees for Large Alignments.** *PLoS One* 2010, **5**(3):e9490.
76. Stamatakis A: **RAXML version 8: a tool for phylogenetic analysis and post-analysis of large phylogenies.** *Bioinformatics* 2014, **30**(9):1312-1313.
77. Ludwig W, Strunk O, Westram R, Richter L, Meier H, Yadhukumar, Buchner A, Lai T, Steppi S, Jobb G *et al*: **ARB: a software environment for sequence data.** *Nucleic Acids Res* 2004, **32**(4):1363-1371.
78. Parks DH, Imelfort M, Skennerton CT, Hugenholtz P, Tyson GW: **CheckM: assessing the quality of microbial genomes recovered from isolates, single cells, and metagenomes.** *Genome Res* 2015, **25**(7):1043-1055.
79. Eddy SR: **Accelerated Profile HMM Searches.** *PLoS Comp Biol* 2011, **7**(10):e1002195.
80. Edgar RC: **MUSCLE: multiple sequence alignment with high accuracy and high throughput.** *Nucleic Acids Res* 2004, **32**(5):1792-1797.
81. Sievers F, Wilm A, Dineen D, Gibson TJ, Karplus K, Li W, Lopez R, McWilliam H, Remmert M, Soding J *et al*: **Fast, scalable generation of high-quality protein multiple sequence alignments using Clustal Omega.** *Mol Syst Biol* 2011, **7**:539.
82. Ronquist F, Huelsenbeck JP: **MrBayes 3: Bayesian phylogenetic inference under mixed models.** *Bioinformatics* 2003, **19**(12):1572-1574.
83. Bartling P, Vollmers J, Petersen J: **The first world swimming championships of roseobacters-Phylogenomic insights into an exceptional motility phenotype.** *Syst Appl Microbiol* 2018, **41**(6):544-554.
84. Lechner M, Findeiss S, Steiner L, Marz M, Stadler PF, Prohaska SJ: **Proteinortho: detection of (co-)orthologs in large-scale analysis.** *BMC Bioinform* 2011, **12**:124.
85. Castresana J: **Selection of Conserved Blocks from Multiple Alignments for Their Use in Phylogenetic Analysis.** *Mol Biol Evol* 2000, **17**(4):540-552.
86. Rodriguez-R LM, Konstantinidis KT: **The enveomics collection: a toolbox for specialized analyses of microbial genomes and metagenomes.** *PeerJ Preprints* 2016, **4**:e1900v1901.
87. Lee I, Ouk Kim Y, Park SC, Chun J: **OrthoANI: An improved algorithm and software for calculating average nucleotide identity.** *Int J Syst Evol Microbiol* 2016, **66**(2):1100-1103.
88. Qin QL, Xie BB, Zhang XY, Chen XL, Zhou BC, Zhou J, Oren A, Zhang YZ: **A proposed genus boundary for the prokaryotes based on genomic insights.** *J Bacteriol* 2014, **196**(12):2210-2215.

89. Letunic I, Bork P: **Interactive Tree Of Life (iTOL) v4: recent updates and new developments.** *Nucleic Acids Res* 2019, **47** (W1):W256–W259.
90. Lamason RL, Welch MD: **Actin-based motility and cell-to-cell spread of bacterial pathogens.** *Curr Opin Microbiol* 2017, **35**:48-57.
91. Wagstaff J, Lowe J: **Prokaryotic cytoskeletons: protein filaments organizing small cells.** *Nat Rev Microbiol* 2018, **16**(4):187-201.
92. Burrows LL: ***Pseudomonas aeruginosa* twitching motility: type IV pili in action.** *Annu Rev Microbiol* 2012, **66**:493-520.
93. Holscher T, Kovacs AT: **Sliding on the surface: bacterial spreading without an active motor.** *Environ Microbiol* 2017, **19**(7):2537-2545.
94. Schuhmacher JS, Thormann KM, Bange G: **How bacteria maintain location and number of flagella?** *FEMS Microbiol Rev* 2015, **39**(6):812-822.
95. Kearns DB: **A field guide to bacterial swarming motility.** *Nat Rev Microbiol* 2010, **8**(9):634-644.
96. Harshey RM: **Bacterial motility on a surface: many ways to a common goal.** *Annu Rev Microbiol* 2003, **57**:249-273.
97. Finn RD, Coghill P, Eberhardt RY, Eddy SR, Mistry J, Mitchell AL, Potter SC, Punta M, Qureshi M, Sangrador-Vegas A *et al*: **The Pfam protein families database: towards a more sustainable future.** *Nucleic Acids Res* 2016, **44**(D1):D279-285.
98. Haft DH, Loftus BJ, Richardson DL, Yang F, Eisen JA, Paulsen IT, White O: **TIGRFAMs: a protein family resource for the functional identification of proteins.** *Nucleic Acids Res* 2001, **29**(1):41-43.
99. UniProt C: **UniProt: a worldwide hub of protein knowledge.** *Nucleic Acids Res* 2019, **47**(D1):D506-D515.
100. Mitchell AL, Attwood TK, Babbitt PC, Blum M, Bork P, Bridge A, Brown SD, Chang HY, El-Gebali S, Fraser MI *et al*: **InterPro in 2019: improving coverage, classification and access to protein sequence annotations.** *Nucleic Acids Res* 2019, **47**(D1):D351-D360.
101. Derman AI, Becker EC, Truong BD, Fujioka A, Tucey TM, Erb ML, Patterson PC, Pogliano J: **Phylogenetic analysis identifies many uncharacterized actin-like proteins (Alps) in bacteria: regulated polymerization, dynamic instability and treadmilling in Alp7A.** *Mol Microbiol* 2009, **73**(4):534-552.
102. Marchler-Bauer A, Panchenko AR, Shoemaker BA, Thiessen PA, Geer LY, Bryant SH: **CDD: a database of conserved domain alignments with links to domain three-dimensional structure.** *Nucleic Acids Res* 2002, **30**(1):281-283.
103. Buchfink B, Xie C, Huson, D.H.: **Fast and sensitive protein alignment using DIAMOND.** *Nat Methods* 2015, **12**(1):59.
104. Edgar RC: **Search and clustering orders of magnitude faster than BLAST.** *Bioinformatics* 2010, **26**(19):2460-2461.
105. Katoh K, Standley DM: **MAFFT multiple sequence alignment software version 7: improvements in performance and usability.** *Mol Biol Evol* 2013, **30**(4):772-780.
106. Schumann P: **5 - Peptidoglycan Structure.** In: *Methods in Microbiology*. Edited by Fred R, Aharon O, vol. 38: Academic Press; 2011: 101-129.
107. Wittmann J, Dreiseikelmann B, Rohde C, Rohde M, Sikorski J: **Isolation and characterization of numerous novel phages targeting diverse strains of the ubiquitous and opportunistic pathogen *Achromobacter xylosoxidans*.** *PLoS One* 2014, **9**(1):e86935.
108. Tivol WF, Briegel A, Jensen GJ: **An improved cryogen for plunge freezing.** *Microsc Microanal* 2008, **14**(5):375-379.

109. Rigort A, Bauerlein FJ, Villa E, Eibauer M, Laugks T, Baumeister W, Plitzko JM: **Focused ion beam micromachining of eukaryotic cells for cryoelectron tomography.** *Proc Natl Acad Sci U S A* 2012, **109**(12):4449-4454.
110. Zheng SQ, Palovcak E, Armache JP, Verba KA, Cheng Y, Agard DA: **MotionCor2: anisotropic correction of beam-induced motion for improved cryo-electron microscopy.** *Nat Methods* 2017, **14**(4):331-332.
111. Kremer JR, Mastronarde DN, McIntosh JR: **Computer visualization of three-dimensional image data using IMOD.** *J Struct Biol* 1996, **116**(1):71-76.
112. Pascual J, Foesel BU, Geppert A, Huber KJ, Boedeker C, Luckner M, Wanner G, Overmann J: ***Roseisolibacter agri* gen. nov., sp. nov., a novel slow-growing member of the under-represented phylum Gemmatimonadetes.** *Int J Syst Evol Microbiol* 2018, **68**(4):1028-1036.
113. Katzmann E, Scheffel A, Gruska M, Plitzko JM, Schüler D: **Loss of the actin-like protein MamK has pleiotropic effects on magnetosome formation and chain assembly in *Magnetospirillum gryphiswaldense*.** *Mol Microbiol* 2010, **77**(1):208-224.
114. Heyen U, Schüler D: **Growth and magnetosome formation by microaerophilic *Magnetospirillum* strains in an oxygen-controlled fermentor.** *Appl Microbiol Biotechnol* 2003, **61**(5-6):536-544.
115. Borg S, Hofmann J, Pollithy A, Lang C, Schüler D: **New vectors for chromosomal integration enable high-level constitutive or inducible magnetosome expression of fusion proteins in *Magnetospirillum gryphiswaldense*.** *Appl Environ Microbiol* 2014, **80**(8):2609-2616.
116. Ullrich S, Schüler D: **Cre-lox-based method for generation of large deletions within the genomic magnetosome island of *Magnetospirillum gryphiswaldense*.** *Appl Environ Microbiol* 2010, **76**(8):2439-2444.
117. Schindelin J, Arganda-Carreras I, Frise E, Kaynig V, Longair M, Pietzsch T, Preibisch S, Rueden C, Saalfeld S, Schmid B *et al*: **Fiji: an open-source platform for biological-image analysis.** *Nat Methods* 2012, **9**(7):676-682.
